# Supplementary material for: Tree height-diameter allometry and implications for biomass estimates in Northeastern Amazonian forests
Source: PeerJ. 2025 Mar 11;13:e18974. doi: 10.7717/peerj.18974 (PMC11908443; doi:10.7717/peerj.18974)
Supplement: Supplemental Information 2 — Absolute and relative frequency of tree species for terra-firme and várzea. Species are ranked by family name and abundance. [file peerj-13-18974-s002.xlsx]

## Sheet: Folha 1
Family	Species	terra firme	varzea	terra firme %	varzea %
Anacardiaceae	Thyrsodium spruceanum	3	0	0.25974	0
Anacardiaceae	Astronium graveolens	2	0	0.17316	0
Anacardiaceae	Thyrsodium paraense	1	0	0.0865801	0
Anacardiaceae	Tapirira retusa	1	0	0.0865801	0
Anacardiaceae	Tapirira guianensis	1	0	0.0865801	0
Anacardiaceae	Spondias mombim	0	9	0	1.11663
Annonaceae	Duguetia cadaverica	26	0	2.25108	0
Annonaceae	Annona sp1	9	0	0.779221	0
Annonaceae	Fusaea longifolia	8	0	0.692641	0
Annonaceae	Guateria olivacea	7	0	0.606061	0
Annonaceae	Duguetia surinamensis	7	0	0.606061	0
Annonaceae	Duguetia eximia	5	0	0.4329	0
Annonaceae	Xylopia brasiliensis	4	0	0.34632	0
Annonaceae	Bocageopsis pleiosperma	4	0	0.34632	0
Annonaceae	Xylopia calophylla	3	0	0.25974	0
Annonaceae	Unonopsis duckei	3	0	0.25974	0
Annonaceae	Guateria sp	3	0	0.25974	0
Annonaceae	Guateria hypoglauca	2	0	0.17316	0
Annonaceae	Guateria citriodora	2	0	0.17316	0
Annonaceae	Bocageopsis multiflora	2	0	0.17316	0
Annonaceae	Xylopia amazonica	1	0	0.0865801	0
Annonaceae	Xylopia emarginata	1	0	0.0865801	0
Annonaceae	Unonopsis stipitata	1	0	0.0865801	0
Annonaceae	Duguetia stelechantha	1	0	0.0865801	0
Annonaceae	Duguetia flagellaris	1	0	0.0865801	0
Annonaceae	Duguetia bracteosa	1	0	0.0865801	0
Annonaceae	Cremastosperma sp	1	0	0.0865801	0
Annonaceae	Annona amazonica	1	0	0.0865801	0
Annonaceae	Xylopia nitida	0	1	0	0.124069
Annonaceae	Guateria poeppigiana	0	1	0	0.124069
Apocynaceae	Tabernaemontana undulata	9	0	0.779221	0
Apocynaceae	Lacmellea arborescens	4	0	0.34632	0
Apocynaceae	Lacmellea gracilis	2	0	0.17316	0
Apocynaceae	Couma guianensis	2	0	0.17316	0
Apocynaceae	Tabernaemontana disticha	1	0	0.0865801	0
Apocynaceae	Himatanthus sucuuba	1	0	0.0865801	0
Apocynaceae	Aspidosperma desmanthum	1	0	0.0865801	0
Apocynaceae	Indeterminada indeterminada	0	2	0	0.248139
Arecaceae	Geonoma deversa	1	0	0.0865801	0
Arecaceae	Bactris elegans	1	0	0.0865801	0
Arecaceae	Astrocaryum gynacanthum	1	0	0.0865801	0
Arecaceae	Socratea exorrhiza	0	4	0	0.496278
Bignoniaceae	Memora adenophora Sandwith	1	0	0.0865801	0
Bignoniaceae	Jacaranda copaia	1	0	0.0865801	0
Bignoniaceae	Handroanthus sp	1	0	0.0865801	0
Boraginaceae	Cordia naidophila	3	0	0.25974	0
Boraginaceae	Cordia nodosa	1	0	0.0865801	0
Boraginaceae	Cordia tetrandra	0	1	0	0.124069
Burseraceae	Protium nitidifolium	17	0	1.47186	0
Burseraceae	Protium robustum	9	0	0.779221	0
Burseraceae	Protium trifoliolatum	7	0	0.606061	0
Burseraceae	Protium rubrum	6	0	0.519481	0
Burseraceae	Protium polybotryum	5	0	0.4329	0
Burseraceae	Protium pilosum	5	0	0.4329	0
Burseraceae	Tetragastris altissima	4	0	0.34632	0
Burseraceae	Protium tenuifolium	3	0	0.25974	0
Burseraceae	Protium opacum	3	0	0.25974	0
Burseraceae	Protium grandifolium	3	0	0.25974	0
Burseraceae	Protium giganteum	3	0	0.25974	0
Burseraceae	Protium elegans	3	0	0.25974	0
Burseraceae	Protium unifoliolatum	2	0	0.17316	0
Burseraceae	Protium strumosum	2	0	0.17316	0
Burseraceae	Protium decandrum	2	0	0.17316	0
Burseraceae	Protium apiculatum	2	0	0.17316	0
Burseraceae	Protium sp	1	1	0.0865801	0.124069
Burseraceae	Protium subserratum	1	0	0.0865801	0
Burseraceae	Protium spruceanum	1	0	0.0865801	0
Burseraceae	Protium pilosissimum	1	0	0.0865801	0
Burseraceae	Protium paniculatum	1	0	0.0865801	0
Burseraceae	Protium occultum	1	0	0.0865801	0
Burseraceae	Protium nitidum	1	0	0.0865801	0
Burseraceae	Protium heptaphyllum	1	0	0.0865801	0
Burseraceae	Protium gallosum	1	0	0.0865801	0
Burseraceae	Protium ferrugineum	1	0	0.0865801	0
Burseraceae	Protium amazonicum	1	0	0.0865801	0
Calophyllaceae	Calycophyllum brasiliensis	0	2	0	0.248139
Caryocaraceae	Caryocar microcarpum	0	1	0	0.124069
Celastraceae	Salacia multiflora	2	0	0.17316	0
Celastraceae	Maytenus guianensis	2	0	0.17316	0
Celastraceae	Cheiloclinium hippocrateoides (Peyr.) A.C. Sm.	1	0	0.0865801	0
Chrysobalanaceae	Hirtella rodriguesii	13	0	1.12554	0
Chrysobalanaceae	Couepia guianensis	12	0	1.03896	0
Chrysobalanaceae	Licania lata	3	0	0.25974	0
Chrysobalanaceae	Licania heteromorpha	3	0	0.25974	0
Chrysobalanaceae	Licania canescens	3	0	0.25974	0
Chrysobalanaceae	Licania sandwithii	2	0	0.17316	0
Chrysobalanaceae	Licania prismatocarpa	2	0	0.17316	0
Chrysobalanaceae	Licania latifolia	2	0	0.17316	0
Chrysobalanaceae	Licania guianensis	2	0	0.17316	0
Chrysobalanaceae	Licania octandra	1	0	0.0865801	0
Chrysobalanaceae	Licania micrantha	1	0	0.0865801	0
Chrysobalanaceae	Licania longistyla	1	0	0.0865801	0
Chrysobalanaceae	Licania impressa	1	0	0.0865801	0
Chrysobalanaceae	Licania hypoleuca	1	0	0.0865801	0
Chrysobalanaceae	Hirtella hispidula	1	0	0.0865801	0
Chrysobalanaceae	Hirtella bicornis	1	0	0.0865801	0
Chrysobalanaceae	Couepia robusta	1	0	0.0865801	0
Chrysobalanaceae	Patinoa paraensis	0	39	0	4.83871
Chrysobalanaceae	Licania sp	0	20	0	2.48139
Chrysobalanaceae	Licania macrophylla	0	17	0	2.10918
Chrysobalanaceae	Parinari excelsa	0	2	0	0.248139
Clusiaceae	Garcinia acuminata	5	0	0.4329	0
Clusiaceae	Tovomita sp	3	0	0.25974	0
Clusiaceae	Tovomita schomburgkii	3	0	0.25974	0
Clusiaceae	Garcinia macrophylla	1	0	0.0865801	0
Clusiaceae	Dystovomita brasiliensis	1	0	0.0865801	0
Clusiaceae	Rheedia macrophylla	0	2	0	0.248139
Clusiaceae	Tovomita sp1	0	1	0	0.124069
Clusiaceae	Symphonia globulifera	0	1	0	0.124069
Combretaceae	Buchenavia grandis	2	0	0.17316	0
Combretaceae	Buchenavia sp	1	0	0.0865801	0
Combretaceae	Buchenavia congesta	1	0	0.0865801	0
Connaraceae	Miconia argyrophylla	1	0	0.0865801	0
Dichapetalaceae	Tapura sp	1	0	0.0865801	0
Dichapetalaceae	Tapura guianensis	1	0	0.0865801	0
Dichapetalaceae	Tapura amazonica	1	0	0.0865801	0
Dichapetalaceae	Calyptranthes forsteri	1	0	0.0865801	0
Ebenaceae	Diospyros cavalcantei	4	0	0.34632	0
Ebenaceae	Diospyros carbonaria	1	0	0.0865801	0
Elaeocarpaceae	Sloanea floribunda	3	0	0.25974	0
Elaeocarpaceae	Sloanea excelsa	3	0	0.25974	0
Elaeocarpaceae	Sloanea pubescens	2	0	0.17316	0
Elaeocarpaceae	Sloanea latifolia	2	0	0.17316	0
Elaeocarpaceae	Tapura amazonica	1	0	0.0865801	0
Elaeocarpaceae	Sloanea rufa	1	0	0.0865801	0
Elaeocarpaceae	Sloanea grandifolia	0	1	0	0.124069
Euphorbiaceae	Conceveiba guianensis	5	0	0.4329	0
Euphorbiaceae	Mabea speciosa	3	0	0.25974	0
Euphorbiaceae	Mabea piriri	3	0	0.25974	0
Euphorbiaceae	Sagotia sp	1	0	0.0865801	0
Euphorbiaceae	Mabea angularis	1	0	0.0865801	0
Euphorbiaceae	Conceveiba martiana	1	0	0.0865801	0
Euphorbiaceae	Aparisthmium cordatum	1	0	0.0865801	0
Euphorbiaceae	Hevea brasiliensis	0	14	0	1.73697
Euphorbiaceae	Sapium sp	0	1	0	0.124069
Fabaceae	Vouacapoua americana	42	0	3.63636	0
Fabaceae	Tachigali myrmecophila	9	0	0.779221	0
Fabaceae	Eperua sp	8	0	0.692641	0
Fabaceae	Tachigali micropetala	4	0	0.34632	0
Fabaceae	Pseudopiptadenia suaveolens	4	0	0.34632	0
Fabaceae	Ormosia paraensis	3	0	0.25974	0
Fabaceae	Inga melinonis	3	0	0.25974	0
Fabaceae	Eperua sp1	3	0	0.25974	0
Fabaceae	Zygia racemosa	2	0	0.17316	0
Fabaceae	Pterocarpus rohrii	2	0	0.17316	0
Fabaceae	Monopteryx inpae	2	0	0.17316	0
Fabaceae	Inga umbratica	2	0	0.17316	0
Fabaceae	Inga macrophylla	2	0	0.17316	0
Fabaceae	Inga leiocalycina	2	0	0.17316	0
Fabaceae	Inga cayennensis	2	0	0.17316	0
Fabaceae	Inga alba	2	0	0.17316	0
Fabaceae	Dialium guianense	2	0	0.17316	0
Fabaceae	Chamaecrista negrensis	2	0	0.17316	0
Fabaceae	Bowdichia virgilioides	2	0	0.17316	0
Fabaceae	Vatairea guianensis	1	0	0.0865801	0
Fabaceae	Tachigali guianensis	1	0	0.0865801	0
Fabaceae	Swartzia recurva	1	0	0.0865801	0
Fabaceae	Swartzia polyphylla	1	0	0.0865801	0
Fabaceae	Swartzia panacoco	1	0	0.0865801	0
Fabaceae	Swartzia macrophylla	1	0	0.0865801	0
Fabaceae	Swartzia lamellata	1	0	0.0865801	0
Fabaceae	Stryphnodendron racemiferum	1	0	0.0865801	0
Fabaceae	Roucheria punctata	1	0	0.0865801	0
Fabaceae	Poecilanthe effusa	1	0	0.0865801	0
Fabaceae	Inga thibaudiana	1	0	0.0865801	0
Fabaceae	Inga paraensis	1	0	0.0865801	0
Fabaceae	Hymenolobium sericeum	1	0	0.0865801	0
Fabaceae	Hymenolobium heterocarpum	1	0	0.0865801	0
Fabaceae	Dipteryx sp1	1	0	0.0865801	0
Fabaceae	Dipteryx odorata	1	0	0.0865801	0
Fabaceae	Dinizia excelsa	1	0	0.0865801	0
Fabaceae	Dimorphandra pennigera	1	0	0.0865801	0
Fabaceae	Copaifera langsdorffii	1	0	0.0865801	0
Fabaceae	Bocoa alterna	1	0	0.0865801	0
Fabaceae	Andira sp1	1	0	0.0865801	0
Fabaceae	Andira sp	1	0	0.0865801	0
Fabaceae	Mora paraensis	0	290	0	35.9801
Fabaceae	Pentaclethra macroloba	0	72	0	8.933
Fabaceae	Swartzia racemosa	0	35	0	4.34243
Fabaceae	Macrolobium sp	0	17	0	2.10918
Fabaceae	Pithecellobium inaequale	0	15	0	1.86104
Fabaceae	Inga sp	0	10	0	1.24069
Fabaceae	Platymiscium ulei	0	8	0	0.992556
Fabaceae	Tarralea oppositifolia	0	4	0	0.496278
Fabaceae	Ormosia coutinhoi	0	3	0	0.372208
Fabaceae	Vatairea erythrocarpa	0	2	0	0.248139
Fabaceae	Piptadenia viridiflora	0	2	0	0.248139
Fabaceae	Hymenaea intermedia	0	2	0	0.248139
Fabaceae	Campsiandra laurifolia	0	2	0	0.248139
Fabaceae	Zygia sp	0	1	0	0.124069
Fabaceae	Swartzia sp	0	1	0	0.124069
Fabaceae	Macrolobium sp1	0	1	0	0.124069
Goupiaceae	Goupia glabra	2	0	0.17316	0
Guttiferae	Caraipa densiflora	0	1	0	0.124069
Hernandiaceae	Hernandia guianensis	0	1	0	0.124069
Humiriaceae	Sacoglottis guianensis	3	0	0.25974	0
Humiriaceae	Endopleura uchi	1	0	0.0865801	0
Humiriaceae	Vantanea sp	0	2	0	0.248139
Indeterminada	Indeterminada indeterminada	7	10	0.606061	1.24069
Lacistemataceae	Lacistema aggregatum	2	0	0.17316	0
Lacistemataceae	Lacistema grandifolium	1	0	0.0865801	0
Lauraceae	Ocotea rhynchophylla	22	0	1.90476	0
Lauraceae	Ocotea percurrens	7	0	0.606061	0
Lauraceae	Aniba panurensis	5	0	0.4329	0
Lauraceae	Mezilaurus itauba	4	0	0.34632	0
Lauraceae	Ocotea matogrossensis	3	0	0.25974	0
Lauraceae	Ocotea cujumary	3	0	0.25974	0
Lauraceae	Ocotea cinerea	3	0	0.25974	0
Lauraceae	Sextonia rubra	2	0	0.17316	0
Lauraceae	Ocotea puberula	2	0	0.17316	0
Lauraceae	Ocotea nigrescens	2	0	0.17316	0
Lauraceae	Aniba rosaeodora	2	0	0.17316	0
Lauraceae	Rhodostemonodaphne grandis	1	0	0.0865801	0
Lauraceae	Ocotea sp	1	0	0.0865801	0
Lauraceae	Ocotea olivacea	1	0	0.0865801	0
Lauraceae	Ocotea amazonica	1	0	0.0865801	0
Lauraceae	Mezilaurus sp	1	0	0.0865801	0
Lauraceae	Mezilaurus duckei	1	0	0.0865801	0
Lauraceae	Licaria cannella	1	0	0.0865801	0
Lauraceae	Endlicheria bracteolata	1	0	0.0865801	0
Lauraceae	Aniba terminalis	1	0	0.0865801	0
Lauraceae	Aniba sp	1	0	0.0865801	0
Lauraceae	Aniba megaphylla	1	0	0.0865801	0
Lauraceae	Licaria mahuba	0	11	0	1.36476
Lauraceae	Lauraceae sp	0	4	0	0.496278
Lecythidaceae	Eschweilera coriacea	42	0	3.63636	0
Lecythidaceae	Lecythis chartacea	34	0	2.94372	0
Lecythidaceae	Eschweilera ovata	30	0	2.5974	0
Lecythidaceae	Eschweilera nana	14	0	1.21212	0
Lecythidaceae	Eschweilera sp	13	0	1.12554	0
Lecythidaceae	Lecythis poiteaui	8	0	0.692641	0
Lecythidaceae	Eschweilera truncata	7	0	0.606061	0
Lecythidaceae	Eschweilera pedicellata	6	0	0.519481	0
Lecythidaceae	Eschweilera atropetiolata	2	0	0.17316	0
Lecythidaceae	Corythophora amapaensis	2	0	0.17316	0
Lecythidaceae	Lecythis zabucajo	1	0	0.0865801	0
Lecythidaceae	Lecythis sp2	1	0	0.0865801	0
Lecythidaceae	Lecythis lurida	1	0	0.0865801	0
Lecythidaceae	Eschweilera wachenheimii	1	0	0.0865801	0
Lecythidaceae	Eschweilera rankiniae	1	0	0.0865801	0
Lecythidaceae	Eschweilera parvifolia	1	0	0.0865801	0
Lecythidaceae	Eschweilera bracteosa	1	0	0.0865801	0
Lecythidaceae	Dialium guianense	1	0	0.0865801	0
Lecythidaceae	Couratari oblongifolia	1	0	0.0865801	0
Lecythidaceae	Corythophora rimosa	1	0	0.0865801	0
Lecythidaceae	Corythophora alta	1	0	0.0865801	0
Lecythidaceae	Gustavia hexapetala	0	4	0	0.496278
Linaceae	Hebepetalum humiriifolium	4	0	0.34632	0
Malpighiaceae	Byrsonima crispa	1	0	0.0865801	0
Malvaceae	Theobroma subincanum	6	0	0.519481	0
Malvaceae	Matisia sp1	3	0	0.25974	0
Malvaceae	Matisia ochrocalyx	3	0	0.25974	0
Malvaceae	Sterculia pruriens	2	0	0.17316	0
Malvaceae	Sterculia frondosa	2	0	0.17316	0
Malvaceae	Lueheopsis rosea	2	0	0.17316	0
Malvaceae	Sterculia peruviana	1	0	0.0865801	0
Malvaceae	Sterculia duckei	1	0	0.0865801	0
Malvaceae	Cupania hispida	1	0	0.0865801	0
Malvaceae	Apeiba echinata	1	0	0.0865801	0
Malvaceae	Quararibea guianensis	0	11	0	1.36476
Malvaceae	Sterculia sp	0	5	0	0.620347
Malvaceae	Pseudobombax munguba	0	1	0	0.124069
Malvaceae	Pachira aquatica	0	1	0	0.124069
Malvaceae	Herrania mariae	0	1	0	0.124069
Malvaceae	Guazuma ulmifolia	0	1	0	0.124069
Melastomataceae	Miconia splendens	7	0	0.606061	0
Melastomataceae	Miconia argyrophylla	7	0	0.606061	0
Melastomataceae	Mouriri sp	2	0	0.17316	0
Melastomataceae	Mouriri dimorphandra	2	0	0.17316	0
Melastomataceae	Pouteria peruviensis	1	0	0.0865801	0
Melastomataceae	Mouriri trunciflora	1	0	0.0865801	0
Melastomataceae	Mouriri ficoides	1	0	0.0865801	0
Melastomataceae	Mouriri collocarpa	1	0	0.0865801	0
Melastomataceae	Miconia traillii	1	0	0.0865801	0
Melastomataceae	Miconia tetrasperma	1	0	0.0865801	0
Melastomataceae	Miconia multiflora	1	0	0.0865801	0
Melastomataceae	Miconia dispar	1	0	0.0865801	0
Melastomataceae	Mouriri sp1	0	4	0	0.496278
Meliaceae	Guarea pubescens	16	0	1.38528	0
Meliaceae	Carapa guianensis	11	21	0.952381	2.60546
Meliaceae	Trichilia schomburgkii	9	0	0.779221	0
Meliaceae	Guarea humaitensis	5	0	0.4329	0
Meliaceae	Trichilia rubra	2	0	0.17316	0
Meliaceae	Trichilia cipo	2	0	0.17316	0
Meliaceae	Trichilia areolata	2	0	0.17316	0
Meliaceae	Guarea sp1	2	0	0.17316	0
Meliaceae	Guarea carinata	2	0	0.17316	0
Meliaceae	Trichilia pleeana	1	0	0.0865801	0
Meliaceae	Trichilia pallida	1	0	0.0865801	0
Meliaceae	Trichilia sp	0	8	0	0.992556
Meliaceae	Guarea guidonia	0	1	0	0.124069
Moraceae	Brosimum guianense	5	0	0.4329	0
Moraceae	Helianthostylis sprucei	3	0	0.25974	0
Moraceae	Sorocea guilleminiana	2	0	0.17316	0
Moraceae	Helicostylis scabra	2	0	0.17316	0
Moraceae	Brosimum rubescens	2	0	0.17316	0
Moraceae	Pseudolmedia laevis	1	0	0.0865801	0
Moraceae	Pseudolmedia laevigata	1	0	0.0865801	0
Moraceae	Helicostylis tomentosa	1	0	0.0865801	0
Moraceae	Helianthostylis steyermarkii	1	0	0.0865801	0
Moraceae	Helianthostylis rhynchophylla	1	0	0.0865801	0
Moraceae	Brosimum parinarioides	1	0	0.0865801	0
Moraceae	Maquira coriacea	0	5	0	0.620347
Moraceae	Ficus maxima	0	2	0	0.248139
Myristicaceae	Virola michelii	8	0	0.692641	0
Myristicaceae	Osteophloeum platyspermum	3	0	0.25974	0
Myristicaceae	Vouacapoua americana	1	0	0.0865801	0
Myristicaceae	Virola bicuhyba	1	0	0.0865801	0
Myristicaceae	Iryanthera juruensis	1	0	0.0865801	0
Myristicaceae	Iryanthera coriacea	1	0	0.0865801	0
Myristicaceae	Compsoneura ulei	1	0	0.0865801	0
Myristicaceae	Virola surinamensis	0	14	0	1.73697
Myrtaceae	Eugenia cupulata	26	0	2.25108	0
Myrtaceae	Eugenia tapacumensis	9	0	0.779221	0
Myrtaceae	Myrcia grandis	6	0	0.519481	0
Myrtaceae	Eugenia florida	6	0	0.519481	0
Myrtaceae	Eugenia sp1	4	0	0.34632	0
Myrtaceae	Myrcia sp1	3	0	0.25974	0
Myrtaceae	Eugenia longiracemosa	3	0	0.25974	0
Myrtaceae	Myrciaria floribunda	2	0	0.17316	0
Myrtaceae	Eugenia sp2	2	0	0.17316	0
Myrtaceae	Eugenia sp	2	0	0.17316	0
Myrtaceae	Eugenia patrisii	2	0	0.17316	0
Myrtaceae	Eugenia agathopoda	2	0	0.17316	0
Myrtaceae	Myrcia sp3	1	0	0.0865801	0
Myrtaceae	Myrcia sp2	1	0	0.0865801	0
Myrtaceae	Myrcia floribunda	1	0	0.0865801	0
Myrtaceae	Myrcia fallax	1	0	0.0865801	0
Myrtaceae	Eugenia subterminalis	1	0	0.0865801	0
Myrtaceae	Eugenia strictopetala	1	0	0.0865801	0
Myrtaceae	Eugenia sp4	1	0	0.0865801	0
Myrtaceae	Eugenia browsnbergii	0	20	0	2.48139
Myrtaceae	Indeterminada indeterminada	0	8	0	0.992556
Myrtaceae	Calyptranthes speciosa	0	2	0	0.248139
Nyctaginaceae	Neea floribunda	2	0	0.17316	0
Nyctaginaceae	Neea ovalifolia	1	0	0.0865801	0
Nyctaginaceae	Guapira sp1	1	0	0.0865801	0
Ochnaceae	Quiina negrensis	2	0	0.17316	0
Ochnaceae	Lacunaria macrostachya	2	0	0.17316	0
Ochnaceae	Ouratea obovata	1	0	0.0865801	0
Ochnaceae	Lacunaria jenmanii	1	0	0.0865801	0
Olacaceae	Minquartia guianensis	9	0	0.779221	0
Olacaceae	Heisteria acuminata	2	0	0.17316	0
Olacaceae	Ptychopetalum olacoides	1	0	0.0865801	0
Olacaceae	Heisteria barbata	1	0	0.0865801	0
Olacaceae	Aptandra tubicina	1	0	0.0865801	0
Olacaceae	Heisteria sp	0	10	0	1.24069
Papilionoideae	Pterocarpus officinalis	0	15	0	1.86104
Papilionoideae	Swartzia leptopetala	0	7	0	0.868486
Papilionoideae	Vatairea guianensis	0	1	0	0.124069
Peraceae	Pogonophora schomburgkiana	1	0	0.0865801	0
Picramniaceae	Picramnia juniniana	2	0	0.17316	0
Picramniaceae	Picramnia sp	1	0	0.0865801	0
Piperaceae	Piper paraense	1	0	0.0865801	0
Rhabdodendraceae	Rhabdodendron amazonicum	1	0	0.0865801	0
Rubiaceae	Kutchubaea sericantha	6	0	0.519481	0
Rubiaceae	Duroia macrophylla	4	0	0.34632	0
Rubiaceae	Duroia gransabanensis	3	0	0.25974	0
Rubiaceae	Alibertia myrciifolia	2	0	0.17316	0
Rubiaceae	Palicourea egena	1	0	0.0865801	0
Rubiaceae	Chimarrhis turbinata	1	0	0.0865801	0
Rubiaceae	Amaioua guianensis	1	0	0.0865801	0
Rubiaceae	Calycophyllum spruceanum	0	20	0	2.48139
Rubiaceae	Genipa americana	0	4	0	0.496278
Salicaceae	Casearia sp	2	0	0.17316	0
Salicaceae	Casearia ulmifolia	1	0	0.0865801	0
Sapindaceae	Toulicia guianensis	2	0	0.17316	0
Sapindaceae	Talisia allenii	2	0	0.17316	0
Sapindaceae	Cupania sp1	2	0	0.17316	0
Sapindaceae	Toulicia pulvinata	1	0	0.0865801	0
Sapindaceae	Talisia veraluciana	1	0	0.0865801	0
Sapindaceae	Talisia macrophylla	1	0	0.0865801	0
Sapindaceae	Matayba arborescens	1	0	0.0865801	0
Sapindaceae	Cupania scrobiculata	1	0	0.0865801	0
Sapindaceae	Cupania hispida	1	0	0.0865801	0
Sapindaceae	Andira sp2	1	0	0.0865801	0
Sapotaceae	Micropholis guyanensis	16	0	1.38528	0
Sapotaceae	Manilkara huberi	12	0	1.03896	0
Sapotaceae	Pouteria pallens	10	0	0.865801	0
Sapotaceae	Chrysophyllum colombianum	8	0	0.692641	0
Sapotaceae	Pouteria hispida	7	0	0.606061	0
Sapotaceae	Pouteria elegans	7	0	0.606061	0
Sapotaceae	Pouteria engleri	5	0	0.4329	0
Sapotaceae	Pouteria petiolata	3	0	0.25974	0
Sapotaceae	Pouteria peruviensis	3	0	0.25974	0
Sapotaceae	Pouteria erythrochrysa	3	0	0.25974	0
Sapotaceae	Micropholis casiquiarensis	3	0	0.25974	0
Sapotaceae	Chrysophyllum sanguinolentum	3	0	0.25974	0
Sapotaceae	Chrysophyllum pomiferum	3	0	0.25974	0
Sapotaceae	Chrysophyllum argenteum	3	0	0.25974	0
Sapotaceae	Pouteria virescens	2	0	0.17316	0
Sapotaceae	Pouteria torta	2	0	0.17316	0
Sapotaceae	Pouteria fulva	2	0	0.17316	0
Sapotaceae	Pouteria durlandii	2	0	0.17316	0
Sapotaceae	Pouteria cuspidata	2	0	0.17316	0
Sapotaceae	Pouteria cladantha	2	0	0.17316	0
Sapotaceae	Pouteria campanulata	2	0	0.17316	0
Sapotaceae	Pouteria bilocularis	2	0	0.17316	0
Sapotaceae	Manilkara bidentata	2	0	0.17316	0
Sapotaceae	Pouteria reticulata	1	10	0.0865801	1.24069
Sapotaceae	Sloanea latifolia	1	0	0.0865801	0
Sapotaceae	Pradosia cochlearia	1	0	0.0865801	0
Sapotaceae	Pouteria sp	1	0	0.0865801	0
Sapotaceae	Pouteria punctata	1	0	0.0865801	0
Sapotaceae	Pouteria platyphylla	1	0	0.0865801	0
Sapotaceae	Pouteria guianensis	1	0	0.0865801	0
Sapotaceae	Pouteria flavilatex	1	0	0.0865801	0
Sapotaceae	Pouteria eugeniifolia	1	0	0.0865801	0
Sapotaceae	Micropholis venulosa	1	0	0.0865801	0
Sapotaceae	Manilkara paraensis	1	0	0.0865801	0
Sapotaceae	Chrysophyllum venezuelanense	1	0	0.0865801	0
Sapotaceae	Chrysophyllum rufum	1	0	0.0865801	0
Sapotaceae	Chrysophyllum prieurii	1	0	0.0865801	0
Sapotaceae	Chrysophyllum amazonicum	1	0	0.0865801	0
Sapotaceae	Chrysophyllum excelsum	0	10	0	1.24069
Sapotaceae	Pouteria filipes	0	5	0	0.620347
Simaroubaceae	Simaba cedron	15	0	1.2987	0
Simaroubaceae	Simarouba amara	1	0	0.0865801	0
Simaroubaceae	Simaba polyphylla	1	0	0.0865801	0
Simaroubaceae	Pourouma bicolor	1	0	0.0865801	0
Siparunaceae	Siparuna decipiens	15	0	1.2987	0
Siparunaceae	Siparuna sp	2	0	0.17316	0
Siparunaceae	Siparuna monogyna	1	0	0.0865801	0
Siparunaceae	Siparuna glycycarpa	1	0	0.0865801	0
Stemonuraceae	Discophora guianensis	1	0	0.0865801	0
Ulmaceae	Ampelocera edentula	1	0	0.0865801	0
Urticaceae	Pourouma villosa	6	0	0.519481	0
Urticaceae	Pourouma tomentosa	4	0	0.34632	0
Urticaceae	Pourouma cuspidata	1	0	0.0865801	0
Urticaceae	Pourouma cecropiifolia	1	0	0.0865801	0
Urticaceae	Cecropia sciadophylla	1	0	0.0865801	0
Urticaceae	Bombacopsis nervosa	1	0	0.0865801	0
Violaceae	Rinorea guianensis	1	0	0.0865801	0
Violaceae	Rinorea amapensis	1	0	0.0865801	0
Violaceae	Paypayrola grandiflora	1	0	0.0865801	0
Violaceae	Rinorea lindeniana	0	1	0	0.124069
Vochysiaceae	Qualea paraensis	4	0	0.34632	0
Vochysiaceae	Erisma bicolor	1	0	0.0865801	0
