# Supplementary material for: Tree height-diameter allometry and implications for biomass estimates in Northeastern Amazonian forests
Source: PeerJ. 2025 Mar 11;13:e18974. doi: 10.7717/peerj.18974 (PMC11908443; doi:10.7717/peerj.18974)
Supplement: Supplemental Information 8 — Each tree is given an associated plot code, tree tag, scientific species name, diameter at breast height (DBH) measured at 1.3 m above the ground and total height (m) measured with a laser hypsometer. Comma is the decimal separator. [file peerj-13-18974-s008.xlsx]

## Sheet: DataDiamHeigh
forest type	plot code	tree tag	species	DBH (cm)	Total height (m)
terra firme	L1T0500	4000	Duguetia cadaverica	1.2	2.5
terra firme	L1T0500	4002	Duguetia bracteosa	16.9	15.19
terra firme	L1T0500	4003	Trichilia pleeana	3.8	6.18
terra firme	L1T0500	4004	Guarea pubescens	2.1	4.36
terra firme	L1T0500	4005	Hirtella rodriguesii	13.6	16.16
terra firme	L1T0500	4006	Hirtella rodriguesii	2.1	4.68
terra firme	L1T0500	4007	Eugenia florida	3.4	4.93
terra firme	L1T0500	4008	Eugenia cupulata	6.2	4.65
terra firme	L1T0500	4009	Pouteria hispida	5.1	6.51
terra firme	L1T0500	4010	Duguetia cadaverica	2.1	3.77
terra firme	L1T0500	4011	Fusaea longifolia	1.7	3.2
terra firme	L1T0500	4012a	Cupania hispida	1.6	2.6
terra firme	L1T0500	4013	Trichilia schomburgkii	4.9	7.64
terra firme	L1T0500	4014	Ocotea puberula	5.6	7.98
terra firme	L1T0500	4015	Trichilia schomburgkii	3.8	6.18
terra firme	L1T0500	4016	Tachigali myrmecophila	6.3	12.46
terra firme	L1T0500	4017	Helianthostylis sprucei	2.1	3.65
terra firme	L1T0500	4018	Duguetia eximia	1.2	2.3
terra firme	L1T0500	4019	Pseudopiptadenia suaveolens	5.8	13.93
terra firme	L1T0500	4020	Siparuna decipiens	1	2.5
terra firme	L1T0500	4021	Pourouma cuspidata	3.5	11.48
terra firme	L1T0500	4022	Alibertia myrciifolia	1.5	2.95
terra firme	L1T0500	4023	Sacoglottis guianensis	2.1	5.12
terra firme	L1T0500	4024	Xylopia brasiliensis	1.2	3.66
terra firme	L1T0500	4025	Protium pilosum	3.3	6.63
terra firme	L1T0500	4026	Eugenia longiracemosa	9.8	12.87
terra firme	L1T0500	4027	Inga umbratica	3.1	7.26
terra firme	L1T0500	4028	Cordia nodosa	8.2	10.04
terra firme	L1T0500	4029	Protium nitidifolium	6.4	10.63
terra firme	L1T0500	4030	Guarea pubescens	3.4	6.74
terra firme	L1T0500	4033	Indeterminada indeterminada	4.2	6.07
terra firme	L1T0500	4034	Hirtella bicornis	29.7	23.2
terra firme	L1T0500	4035	Eugenia florida	3.3	4.85
terra firme	L1T0500	4036	Lacmellea arborescens	5.4	7.78
terra firme	L1T0500	4037	Hirtella rodriguesii	9.5	11.24
terra firme	L1T0500	4038	Minquartia guianensis	11.8	17.47
terra firme	L1T0500	4039	Myrciaria floribunda	27.2	4.38
terra firme	L1T0500	4040	Memora adenophora Sandwith	1	2.5
terra firme	L1T0500	4041	Myrcia floribunda	19.1	19.1
terra firme	L1T0500	4042	Duguetia eximia	1.5	2.4
terra firme	L1T0500	4043	Myrciaria floribunda	4.5	7.5
terra firme	L1T0500	4044	Pouteria elegans	11.1	11.37
terra firme	L1T0500	4045	Protium strumosum	21.5	19.59
terra firme	L1T0500	4046	Hirtella rodriguesii	8	13.38
terra firme	L1T0500	4048	Miconia argyrophylla	1.1	2.6
terra firme	L1T0500	4049	Pouteria peruviensis	16.8	24.6
terra firme	L1T0500	4050	Sloanea latifolia	1.2	3.2
terra firme	L1T0500	4051	Tapura amazonica	5.1	7.9
terra firme	L1T0500	4052	Calyptranthes forsteri	4.4	6.3
terra firme	L1T0500	4053	Trichilia schomburgkii	3.2	6.1
terra firme	L1T0500	4054	Tabernaemontana disticha	1.4	3.5
terra firme	L1T0500	4055	Mezilaurus duckei	1.2	4
terra firme	L1T0500	4056	Protium decandrum	18.1	24.1
terra firme	L1T0500	4057	Salacia multiflora	1.2	2.25
terra firme	L1T0500	4058	Protium rubrum	2.6	6.1
terra firme	L1T0500	4059	Picramnia juniniana	1.8	4.4
terra firme	L1T0500	4060	Guarea pubescens	1	2.4
terra firme	L1T0500	4061	Duguetia eximia	3.4	3.8
terra firme	L1T0500	4062	Ocotea percurrens	5.7	11.5
terra firme	L1T0500	4063	Eugenia strictopetala	2.4	4
terra firme	L1T0500	4064	Eschweilera bracteosa	1.8	4.3
terra firme	L1T0500	4065	Hirtella rodriguesii	2	4.6
terra firme	L1T0500	4066	Protium robustum	5.4	12.6
terra firme	L1T0500	4067	Licania guianensis	1.7	3
terra firme	L1T0500	4068	Eugenia subterminalis	1.8	4
terra firme	L1T0500	4069	Licaria cannella	4.3	8.1
terra firme	L1T0500	4070	Siparuna decipiens	20.1	22
terra firme	L1T0500	4071	Eugenia sp	1.6	2.9
terra firme	L1T0500	4072	Myrcia grandis	9.8	18.5
terra firme	L1T0500	4073a	Duguetia eximia	3.4	2.75
terra firme	L1T0500	4074	Mezilaurus sp	3.1	6.1
terra firme	L1T0500	4075a	Miconia argyrophylla	10	16.1
terra firme	L1T0500	4076	Eschweilera coriacea	40.8	35.3
terra firme	L1T0500	4202	Couepia guianensis	11.3	19.5
terra firme	L1T0500	4203	Pouteria torta	20.7	34.5
terra firme	L1T0500	4204	Ocotea rhynchophylla	20.3	32.9
terra firme	L1T0500	4205	Lueheopsis rosea	56.2	38.6
terra firme	L1T0500	4206	Miconia argyrophylla	14.3	19
terra firme	L1T0500	4207	Protium nitidifolium	26.9	20.3
terra firme	L1T0500	4208	Protium apiculatum	21.3	20.2
terra firme	L1T0500	4209	Casearia ulmifolia	16	17.8
terra firme	L1T0500	4210	Osteophloeum platyspermum	10	16.4
terra firme	L1T0500	4211	Simaba cedron	19.2	12.7
terra firme	L1T0500	4212	Eugenia cupulata	20.8	25.6
terra firme	L1T0500	4213	Eschweilera nana	26.4	25.9
terra firme	L1T0500	4214	Trichilia schomburgkii	10.1	15.1
terra firme	L1T0500	4215	Guarea carinata	14.3	16.9
terra firme	L1T0500	4216	Duroia macrophylla	16.4	14.9
terra firme	L1T0500	4217	Eschweilera truncata	31.6	30.4
terra firme	L1T0500	4218	Licania prismatocarpa	13.1	27.5
terra firme	L1T0500	4219	Eugenia cupulata	18	19.9
terra firme	L1T0500	4220	Eschweilera truncata	14.7	26.4
terra firme	L1T0500	4221	Dinizia excelsa	39.1	25.5
terra firme	L1T0500	4222	Eschweilera truncata	42.9	29.2
terra firme	L1T0500	4223	Micropholis guyanensis	13.8	15.5
terra firme	L1T0500	4224	Ocotea rhynchophylla	15.5	23.3
terra firme	L1T0500	4225	Ormosia paraensis	24.1	29.3
terra firme	L1T0500	4226	Protium occultum	12.9	27.3
terra firme	L1T0500	4227	Trichilia pallida	17.1	24.8
terra firme	L1T0500	4228	Eschweilera truncata	35.4	33.4
terra firme	L1T0500	4229	Lecythis chartacea	16.6	23.5
terra firme	L1T0500	4230	Ormosia paraensis	25.6	23.8
terra firme	L1T0500	4231	Xylopia emarginata	13.5	21.6
terra firme	L1T0500	4232	Protium nitidifolium	22.3	29.1
terra firme	L1T0500	4233	Hirtella rodriguesii	13.1	19.8
terra firme	L1T0500	4234	Tachigali myrmecophila	16	29.9
terra firme	L1T0500	4235	Dialium guianense	86.1	49.9
terra firme	L1T0500	4236	Pourouma villosa	20.2	29.2
terra firme	L1T0500	4237	Protium opacum	11.4	17.4
terra firme	L1T0500	4238	Micropholis casiquiarensis	16.1	23.6
terra firme	L1T0500	4239	Couepia guianensis	10.7	15.1
terra firme	L1T0500	4240	Protium giganteum	14.3	18.7
terra firme	L1T0500	4241	Virola michelii	17	19.9
terra firme	L1T0500	4242	Licania micrantha	30	19.2
terra firme	L1T0500	4243	Micropholis guyanensis	11.6	17.2
terra firme	L1T0500	4244	Trichilia rubra	21.3	18.8
terra firme	L1T0500	4245	Eugenia cupulata	10.8	14.1
terra firme	L1T0500	4246	Eugenia cupulata	28.1	19.2
terra firme	L1T0500	4247	Lecythis chartacea	18.2	22.1
terra firme	L1T0500	4248	Eugenia longiracemosa	21.7	21.4
terra firme	L1T0500	4249	Licania guianensis	11.3	19.2
terra firme	L1T0500	4250	Eschweilera sp	12.8	17.1
terra firme	L1T0500	4251	Virola michelii	28.2	22
terra firme	L1T0500	4252	Kutchubaea sericantha	14	19.4
terra firme	L1T0500	4253	Carapa guianensis	27.2	25.3
terra firme	L1T0500	4254	Protium amazonicum	18.4	20.3
terra firme	L1T0500	4255	Eugenia cupulata	13.8	18.8
terra firme	L1T0500	4256	Handroanthus sp	14.2	13.2
terra firme	L1T0500	4257	Trichilia cipo	11.3	17.5
terra firme	L1T0500	4258	Inga melinonis	31	25.2
terra firme	L1T0500	4259	Siparuna decipiens	17.8	24.9
terra firme	L1T0500	4260	Eugenia cupulata	14.6	16.1
terra firme	L1T0500	4261	Siparuna decipiens	45.2	25.2
terra firme	L1T0500	4262	Hymenolobium heterocarpum	14.2	25.8
terra firme	L1T0500	4263	Licania latifolia	14.8	22.8
terra firme	L1T0500	4264	Protium subserratum	20.1	24.9
terra firme	L1T0500	4265	Astronium graveolens	50.3	35.3
terra firme	L1T0500	4266	Eugenia cupulata	10	15.2
terra firme	L1T0500	4267	Vouacapoua americana	32.2	27.5
terra firme	L1T0500	4268	Eugenia cupulata	21.1	16.4
terra firme	L1T0500	4269	Eschweilera nana	11.2	14.8
terra firme	L1T0500	4270	Kutchubaea sericantha	19.3	15.6
terra firme	L1T0500	4271	Eschweilera nana	12.4	14.58
terra firme	L1T0500	4275	Vouacapoua americana	45.1	22.02
terra firme	L1T0500	4276	Eugenia tapacumensis	15.3	17.96
terra firme	L1T0500	4277	Protium trifoliolatum	11.5	16.88
terra firme	L1T0500	4278	Virola michelii	12.2	18.97
terra firme	L1T0500	4280	Eugenia cupulata	18.9	17.67
terra firme	L1T0500	4281	Ocotea rhynchophylla	16.6	12.46
terra firme	L1T0500	4282	Ocotea rhynchophylla	29.4	20.26
terra firme	L1T0500	4283	Zygia racemosa	10.2	15.43
terra firme	L1T0500	4284	Eperua sp	42.2	32.99
terra firme	L1T0500	4285	Heisteria acuminata	15.9	20
terra firme	L1T0500	4286	Pouteria torta	32.3	22.25
terra firme	L1T0500	4287	Eugenia cupulata	11.8	18.96
terra firme	L1T0500	4288	Ocotea rhynchophylla	13.7	21.29
terra firme	L1T0500	4289	Conceveiba martiana	26	24.81
terra firme	L1T0500	4290	Kutchubaea sericantha	12.4	13.98
terra firme	L1T0500	4291	Eugenia tapacumensis	11.7	15.12
terra firme	L1T0500	4292	Eperua sp	15.5	32.22
terra firme	L1T0500	4293	Protium heptaphyllum	20.7	20.3
terra firme	L1T0500	4294	Ocotea rhynchophylla	23.7	24.34
terra firme	L1T0500	4295	Aniba panurensis	33.9	29.42
terra firme	L1T0500	4296	Eugenia cupulata	10	21.11
terra firme	L1T0500	4297	Protium opacum	12.6	18.97
terra firme	L1T0500	4298	Pouteria guianensis	29.8	31.07
terra firme	L1T0500	4299	Quiina negrensis	13.2	13.74
terra firme	L1T0500	4300	Protium opacum	19	20.52
terra firme	L1T0500	4303	Roucheria punctata	15	17.43
terra firme	L1T0500	4304	Eugenia tapacumensis	10.3	10.53
terra firme	L1T0500	4305	Simaba cedron	10.7	14.12
terra firme	L1T0500	4306	Eugenia tapacumensis	11.4	17.06
terra firme	L1T0500	4307	Eugenia sp1	16	16.48
terra firme	L1T0500	4308	Eugenia sp1	23.3	25
terra firme	L1T0500	4309	Couepia guianensis	21.6	17.6
terra firme	L1T0500	4310	Eugenia sp1	20.9	19.52
terra firme	L1T0500	4311	Protium nitidifolium	25.7	21.14
terra firme	L1T0500	4312	Ocotea rhynchophylla	24.2	19.53
terra firme	L1T0500	4313	Sloanea excelsa	37.4	28.4
terra firme	L1T0500	4314	Ocotea rhynchophylla	21.5	24.58
terra firme	L1T0500	4315	Eugenia cupulata	21.6	20.11
terra firme	L1T0500	4316	Vouacapoua americana	30.9	23.07
terra firme	L1T0500	4317	Eschweilera coriacea	49.1	25.93
terra firme	L1T0500	4318	Micropholis guyanensis	12.2	7.5
terra firme	L1T0500	4319	Pouteria petiolata	11.3	13.2
terra firme	L1T0500	4320	Aniba rosaeodora	17.1	22.3
terra firme	L1T0500	4321	Eperua sp1	38.5	32.8
terra firme	L1T0500	4322	Eschweilera coriacea	33.3	27.3
terra firme	L1T0500	4323	Lacistema aggregatum	17.2	24.4
terra firme	L1T0500	4324	Eugenia cupulata	13	20.3
terra firme	L1T0500	4325	Myrcia fallax	12.5	18.4
terra firme	L1T0500	4326	Eugenia cupulata	23	23.4
terra firme	L1T0500	4327	Pouteria engleri	12	17.8
terra firme	L1T0500	4328	Eugenia cupulata	15	19.7
terra firme	L1T0500	4329	Eschweilera coriacea	17	20.9
terra firme	L1T0500	4330	Ocotea rhynchophylla	17.9	21
terra firme	L1T0500	4331	Micropholis guyanensis	11.4	17.8
terra firme	L1T0500	4332	Xylopia brasiliensis	26	28.8
terra firme	L1T0500	4333	Hymenolobium sericeum	10	16
terra firme	L1T0500	4334	Guarea humaitensis	11.7	9.5
terra firme	L1T0500	4335	Trichilia rubra	11.3	14.8
terra firme	L1T0500	4336	Myrcia grandis	10.2	12
terra firme	L1T0500	4337	Indeterminada indeterminada	17.7	20.3
terra firme	L1T0500	4338	Pouteria punctata	13.4	21.2
terra firme	L1T0500	4339	Simaba cedron	13.5	17
terra firme	L1T0500	4340	Pouteria cladantha	19.5	17.9
terra firme	L1T0500	4341	Micropholis casiquiarensis	15.6	21
terra firme	L1T0500	4342	Pouteria cladantha	11.6	16.1
terra firme	L1T0500	4343	Pouteria cuspidata	28.2	24.9
terra firme	L1T0500	4344	Couepia guianensis	11.6	20.5
terra firme	L1T0500	4345	Hirtella rodriguesii	14.7	21.5
terra firme	L1T0500	4346	Eschweilera coriacea	13.7	20
terra firme	L1T0500	4347	Ocotea rhynchophylla	20.3	21.7
terra firme	L1T0500	4348	Iryanthera coriacea	12	16.5
terra firme	L1T0500	4349	Eschweilera coriacea	12.6	18
terra firme	L1T0500	4405	Eschweilera nana	42.1	32.7
terra firme	L1T0500	4406	Micropholis casiquiarensis	39.4	31.8
terra firme	L1T0500	4407	Xylopia amazonica	36.6	33.2
terra firme	L1T0500	4408	Sterculia duckei	38.9	33.8
terra firme	L1T0500	4409	Sterculia peruviana	54.1	24.6
terra firme	L1T0500	4410	Protium polybotryum	35.1	30.1
terra firme	L1T0500	4411	Eschweilera coriacea	34.7	29.6
terra firme	L1T0500	4412	Vouacapoua americana	53.3	44.6
terra firme	L1T0500	4413	Theobroma subincanum	40.2	31.6
terra firme	L1T0500	4414	Astronium graveolens	109.1	42.5
terra firme	L1T0500	4415	Eschweilera coriacea	31.9	17.8
terra firme	L1T0500	4416	Eschweilera coriacea	57.2	34.3
terra firme	L1T0500	4417	Eperua sp	46.7	34.9
terra firme	L1T0500	4418	Lecythis poiteaui	31.3	27.3
terra firme	L1T0500	4419	Goupia glabra	48.5	39.6
terra firme	L1T0500	4420	Eschweilera coriacea	39.2	32.8
terra firme	L1T0500	4421	Protium polybotryum	34.5	25.5
terra firme	L1T0500	4423	Ocotea percurrens	34.3	26.5
terra firme	L1T0500	4424	Protium paniculatum	30.9	23.1
terra firme	L1T0500	4425	Pouteria cuspidata	37.8	32.8
terra firme	L1T0500	4426	Eschweilera coriacea	41.8	33.4
terra firme	L1T0500	4427a	Couratari oblongifolia	55	37
terra firme	L1T0500	4428	Eperua sp	46.5	35
terra firme	L1T0500	4429	Eschweilera coriacea	35.6	27.9
terra firme	L1T0500	4430	Tachigali guianensis	74.7	50.1
terra firme	L1T0500	4431	Pouteria campanulata	40.4	22.5
terra firme	L1T0500	4432	Byrsonima crispa	38	22
terra firme	L1T0500	4433	Manilkara paraensis	78.1	28
terra firme	L2T2500	4443	Mezilaurus itauba	1.3	2.2
terra firme	L2T2500	4444	Pouteria bilocularis	5.4	7.38
terra firme	L2T2500	4445	Guarea pubescens	2.7	6.54
terra firme	L2T2500	4446	Talisia macrophylla	3.5	4.56
terra firme	L2T2500	4447	Duguetia cadaverica	1.8	6.8
terra firme	L2T2500	4448	Eschweilera truncata	2.5	4.3
terra firme	L2T2500	4449	Eschweilera ovata	4.5	7.51
terra firme	L2T2500	4450	Duguetia cadaverica	3.7	5.76
terra firme	L2T2500	4451	Duguetia cadaverica	3.3	5.5
terra firme	L2T2500	4452	Tachigali micropetala	1.1	2.55
terra firme	L2T2500	4453	Protium nitidifolium	18.7	19.18
terra firme	L2T2500	4454a	Miconia splendens	2	5.64
terra firme	L2T2500	4454c	Miconia splendens	1.2	3
terra firme	L2T2500	4455	Miconia splendens	2.2	5.95
terra firme	L2T2500	4456	Lecythis chartacea	1.4	3
terra firme	L2T2500	4457	Tachigali micropetala	1	2.7
terra firme	L2T2500	4458	Duguetia surinamensis	2.2	4.6
terra firme	L2T2500	4459a	Tabernaemontana undulata	2.7	3.6
terra firme	L2T2500	4460	Mouriri dimorphandra	2.5	6.48
terra firme	L2T2500	4464	Micropholis venulosa	2.6	4.87
terra firme	L2T2500	4465	Guarea pubescens	1	2.65
terra firme	L2T2500	4465a	Guarea pubescens	1.4	2.75
terra firme	L2T2500	4465c	Guarea pubescens	1.9	1.75
terra firme	L2T2500	4468	Protium elegans	2.5	4.86
terra firme	L2T2500	4469	Inga macrophylla	2.7	4.89
terra firme	L2T2500	4470	Inga leiocalycina	2	4.5
terra firme	L2T2500	4471	Ocotea cinerea	6.8	5.79
terra firme	L2T2500	4472	Inga leiocalycina	6.4	7.1
terra firme	L2T2500	4473	Aniba panurensis	6.4	11.13
terra firme	L2T2500	4474	Mouriri dimorphandra	4.3	6.26
terra firme	L2T2500	4476	Eschweilera pedicellata	2.2	4.5
terra firme	L2T2500	4477	Guarea sp1	2.5	3.8
terra firme	L2T2500	4479	Duguetia surinamensis	3.1	10.84
terra firme	L2T2500	4480	Miconia splendens	2.1	5.9
terra firme	L2T2500	4481	Pseudolmedia laevigata	3.8	5.84
terra firme	L2T2500	4482	Inga umbratica	1.2	3.4
terra firme	L2T2500	4483	Miconia splendens	1.1	3.8
terra firme	L2T2500	4484	Fusaea longifolia	1.7	3.55
terra firme	L2T2500	4485	Chrysophyllum sanguinolentum	1.3	3.5
terra firme	L2T2500	4486	Unonopsis duckei	11.2	16.49
terra firme	L2T2500	4487	Duguetia eximia	5.6	8.17
terra firme	L2T2500	4488	Eschweilera atropetiolata	1.7	4.5
terra firme	L2T2500	4489	Couepia guianensis	1.8	5.4
terra firme	L2T2500	4490	Chrysophyllum amazonicum	33.8	19.85
terra firme	L2T2500	4491	Eschweilera coriacea	1.1	4.7
terra firme	L2T2500	4492	Duguetia cadaverica	1.5	2.4
terra firme	L2T2500	4493	Matisia ochrocalyx	10.4	8.84
terra firme	L2T2500	4494	Eugenia tapacumensis	1.2	2.2
terra firme	L2T2500	4495	Garcinia acuminata	6.5	10.62
terra firme	L2T2500	4496	Pouteria sp	11.7	17
terra firme	L2T2500	4497	Duguetia cadaverica	1	1.96
terra firme	L2T2500	4498	Miconia splendens	1.7	3.98
terra firme	L2T2500	4499	Miconia splendens	1.1	3.53
terra firme	L2T2500	4500	Salacia multiflora	1.9	4.2
terra firme	L2T2500	4501	Lecythis chartacea	2.2	3.1
terra firme	L2T2500	4502	Duguetia cadaverica	2.4	4
terra firme	L2T2500	4503	Couepia guianensis	1.6	4
terra firme	L2T2500	4504	Sorocea guilleminiana	4	7
terra firme	L2T2500	4507	Couepia guianensis	2.5	5.5
terra firme	L2T2500	4508	Simaba cedron	2.6	4.5
terra firme	L2T2500	4510	Fusaea longifolia	4.2	8.84
terra firme	L2T2500	4511	Sloanea floribunda	21.2	15.8
terra firme	L2T2500	4512	Duguetia cadaverica	2.5	2.8
terra firme	L2T2500	4513	Endlicheria bracteolata	1.5	3.2
terra firme	L2T2500	4514	Myrcia sp1	2.4	5
terra firme	L2T2500	4515	Mabea speciosa	1	4
terra firme	L2T2500	4519	Eschweilera ovata	2.3	3.5
terra firme	L2T2500	4520	Miconia dispar	3.7	4.8
terra firme	L2T2500	4522	Duguetia cadaverica	2.2	3.5
terra firme	L2T2500	4523a	Chrysophyllum argenteum	3.4	6
terra firme	L2T2500	4524	Chrysophyllum rufum	3.8	6
terra firme	L2T2500	4525	Duguetia cadaverica	1.3	2.3
terra firme	L2T2500	4526	Duguetia cadaverica	1.3	2.9
terra firme	L2T2500	4527	Siparuna decipiens	0.9	4
terra firme	L2T2500	4675	Apeiba echinata	31.2	22.3
terra firme	L2T2500	4678	Hirtella rodriguesii	11.5	16.9
terra firme	L2T2500	4679	Osteophloeum platyspermum	24.9	20
terra firme	L2T2500	4680	Eschweilera pedicellata	24.9	16
terra firme	L2T2500	4681	Hirtella rodriguesii	17.1	15.4
terra firme	L2T2500	4684	Eschweilera ovata	10.4	16.1
terra firme	L2T2500	4685	Erisma bicolor	10.4	19.7
terra firme	L2T2500	4686	Poecilanthe effusa	14	17
terra firme	L2T2500	4687	Protium pilosissimum	17.7	18
terra firme	L2T2500	4688	Pouteria pallens	31.7	26.5
terra firme	L2T2500	4689	Fusaea longifolia	10	12
terra firme	L2T2500	4690	Couma guianensis	61.3	47
terra firme	L2T2500	4691	Siparuna decipiens	28.5	20
terra firme	L2T2500	4692	Lacunaria macrostachya	18.1	19.8
terra firme	L2T2500	4693	Protium nitidifolium	36.6	40.7
terra firme	L2T2500	4694	Qualea paraensis	17.6	21.3
terra firme	L2T2500	4695	Matisia ochrocalyx	10	10
terra firme	L2T2500	4696	Pouteria petiolata	15	38.7
terra firme	L2T2500	4697	Protium nitidifolium	31	36.5
terra firme	L2T2500	4698	Sacoglottis guianensis	16.4	34.1
terra firme	L2T2500	4699	Vouacapoua americana	74.4	37.4
terra firme	L2T2500	4700	Licania sandwithii	18.6	34.5
terra firme	L2T2500	4701	Ocotea cujumary	10.1	15.6
terra firme	L2T2500	4702	Eschweilera ovata	26.2	30.5
terra firme	L2T2500	4703	Protium apiculatum	12.6	21
terra firme	L2T2500	4704	Vouacapoua americana	16.8	17.4
terra firme	L2T2500	4705	Vouacapoua americana	73.8	44.4
terra firme	L2T2500	4706	Lecythis zabucajo	56.6	44.8
terra firme	L2T2500	4707	Virola michelii	12.8	18
terra firme	L2T2500	4708	Tovomita sp	10.9	14.8
terra firme	L2T2500	4709	Micropholis guyanensis	13.5	14
terra firme	L2T2500	4710	Pouteria pallens	25.2	25.8
terra firme	L2T2500	4711	Trichilia schomburgkii	10.6	15.3
terra firme	L2T2500	4712	Couepia guianensis	11.1	12
terra firme	L2T2500	4713	Eschweilera ovata	11.2	14.8
terra firme	L2T2500	4714	Pouteria durlandii	24.4	25.3
terra firme	L2T2500	4715	Licania lata	33.5	23.9
terra firme	L2T2500	4716	Pouteria flavilatex	31.2	22.7
terra firme	L2T2500	4717	Tetragastris altissima	25.5	21.5
terra firme	L2T2500	4718	Chrysophyllum venezuelanense	10.7	20.8
terra firme	L2T2500	4719	Duroia macrophylla	10.3	13.2
terra firme	L2T2500	4720	Duroia macrophylla	16.3	18.5
terra firme	L2T2500	4721	Sacoglottis guianensis	13.8	18.3
terra firme	L2T2500	4722	Carapa guianensis	36.7	28.2
terra firme	L2T2500	4723	Rinorea guianensis	10.2	7.56
terra firme	L2T2500	4725	Vatairea guianensis	16	19.84
terra firme	L2T2500	4726	Carapa guianensis	44.2	32.67
terra firme	L2T2500	4727	Annona sp1	12.1	20.13
terra firme	L2T2500	4728	Tapura amazonica	20.8	21.26
terra firme	L2T2500	4729	Tetragastris altissima	68.1	35.2
terra firme	L2T2500	4730	Andira sp1	14.7	21.29
terra firme	L2T2500	4733	Swartzia polyphylla	26.8	19.71
terra firme	L2T2500	4734	Inga cayennensis	17.5	21.9
terra firme	L2T2500	4735	Eschweilera ovata	26.8	25.94
terra firme	L2T2500	4736	Chrysophyllum pomiferum	38.2	34.87
terra firme	L2T2500	4737	Protium nitidifolium	21.5	13.5
terra firme	L2T2500	4738	Siparuna glycycarpa	16	15.45
terra firme	L2T2500	4739	Licania heteromorpha	29.1	19.9
terra firme	L2T2500	4740	Licania octandra	11.1	18.13
terra firme	L2T2500	4741	Eugenia patrisii	13.4	13.98
terra firme	L2T2500	4742	Tachigali micropetala	16.9	21.04
terra firme	L2T2500	4743	Diospyros cavalcantei	28.5	26.14
terra firme	L2T2500	4745	Xylopia brasiliensis	14.1	21.37
terra firme	L2T2500	4746	Eschweilera coriacea	10	16.53
terra firme	L2T2500	4747	Protium robustum	14.3	22.14
terra firme	L2T2500	4748	Virola bicuhyba	53	44.75
terra firme	L2T2500	4749	Protium trifoliolatum	11	14.68
terra firme	L2T2500	4750	Eugenia tapacumensis	15	19.6
terra firme	L2T2500	4751	Protium sp	22.4	23.15
terra firme	L2T2500	4752	Tetragastris altissima	40.3	28.04
terra firme	L2T2500	4753	Protium trifoliolatum	14.3	19.64
terra firme	L2T2500	4754	Pouteria engleri	20.2	20.09
terra firme	L2T2500	4755	Pourouma tomentosa	37.4	24.83
terra firme	L2T2500	4756	Protium robustum	10.5	15.15
terra firme	L2T2500	4757	Trichilia schomburgkii	16.5	22.11
terra firme	L2T2500	4758	Matisia sp1	15	19.58
terra firme	L2T2500	4759	Licania lata	29.2	18.94
terra firme	L2T2500	4760	Licania lata	12.8	13.87
terra firme	L2T2500	4761	Chrysophyllum pomiferum	15.7	17.7
terra firme	L2T2500	4762	Siparuna decipiens	31.7	24.49
terra firme	L2T2500	4763	Eschweilera ovata	12.6	10.9
terra firme	L2T2500	4764	Kutchubaea sericantha	14.7	15.74
terra firme	L2T2500	4765	Carapa guianensis	27.4	24.39
terra firme	L2T2500	4767	Pourouma bicolor	33.5	31.58
terra firme	L2T2500	4768	Bombacopsis nervosa	11.2	11.07
terra firme	L2T2500	4769	Cupania hispida	13.8	18.47
terra firme	L2T2500	4770	Andira sp2	10.2	14.87
terra firme	L2T2500	4771	Ptychopetalum olacoides	14.5	16.05
terra firme	L2T2500	4773	Virola michelii	19.7	20.34
terra firme	L2T2500	4774	Guarea carinata	11.2	15.61
terra firme	L2T2500	4775	Pouteria elegans	37.4	25.3
terra firme	L2T2500	4776	Pouteria engleri	20.5	21.8
terra firme	L2T2500	4777	Protium pilosum	12.4	16.1
terra firme	L2T2500	4778	Pourouma tomentosa	52.3	33
terra firme	L2T2500	4851	Sloanea latifolia	38.1	41.5
terra firme	L2T2500	4852	Tetragastris altissima	57.5	41.2
terra firme	L2T2500	4853	Inga melinonis	42.6	40.9
terra firme	L2T2500	4854	Vouacapoua americana	38.1	39.1
terra firme	L2T2500	4855	Manilkara huberi	84.2	38.5
terra firme	L2T2500	4856	Licania sandwithii	32.3	33.1
terra firme	L2T2500	4857	Manilkara huberi	105	38.8
terra firme	L2T2500	4858	Eschweilera parvifolia	52.9	34.7
terra firme	L2T2500	4859	Pradosia cochlearia	61	49.5
terra firme	L2T2500	4860	Pouteria erythrochrysa	64.9	48.5
terra firme	L2T2500	4861	Guateria olivacea	33.9	31.7
terra firme	L2T2500	4862	Qualea paraensis	33.2	31.5
terra firme	L2T2500	4863	Sextonia rubra	80	35.1
terra firme	L2T2500	4864	Eschweilera coriacea	62.9	36.3
terra firme	L2T2500	4865	Pouteria pallens	43.6	36.5
terra firme	L2T2500	4866	Pouteria pallens	45.3	27.1
terra firme	L2T2500	4867	Vouacapoua americana	39.5	23.1
terra firme	L2T2500	4868	Siparuna monogyna	77.1	39.8
terra firme	L2T2500	4869	Tachigali myrmecophila	98.4	34.5
terra firme	L2T2500	4870	Diospyros cavalcantei	30.5	27.6
terra firme	L2T2500	4871	Protium giganteum	71	31.2
terra firme	L2T2500	4872	Carapa guianensis	45.4	31.5
terra firme	L2T2500	4873	Carapa guianensis	39.6	23.6
terra firme	L2T2500	4874	Pourouma tomentosa	32	28.2
terra firme	L2T0500	4937	Micropholis guyanensis	23.7	27.1
terra firme	L2T0500	4938	Guarea pubescens	26.5	22
terra firme	L2T0500	4939	Simaba polyphylla	20	26.2
terra firme	L2T0500	4940	Conceveiba guianensis	14.3	6.8
terra firme	L2T0500	4941	Eschweilera nana	15.3	22.4
terra firme	L2T0500	4942	Trichilia schomburgkii	19.2	24.5
terra firme	L2T0500	4943	Eschweilera nana	28.9	26.1
terra firme	L2T0500	4944	Eschweilera nana	10.9	19.5
terra firme	L2T0500	4945	Ocotea rhynchophylla	11.6	17.6
terra firme	L2T0500	4946	Eschweilera nana	17.7	24.2
terra firme	L2T0500	4947	Virola michelii	30.2	30.4
terra firme	L2T0500	4948	Pouteria reticulata	39.5	36.1
terra firme	L2T0500	4949	Eugenia cupulata	14.5	23.9
terra firme	L2T0500	4950	Eschweilera nana	10.5	23.7
terra firme	L2T0500	4952	Eschweilera nana	28.5	27.8
terra firme	L2T0500	4953	Guateria hypoglauca	15.2	19.6
terra firme	L2T0500	4954	Hirtella rodriguesii	11.8	23.1
terra firme	L2T0500	4955	Eschweilera pedicellata	10.3	12.2
terra firme	L2T0500	4956	Lecythis poiteaui	40.8	28.9
terra firme	L2T0500	4957	Myrcia sp2	12.4	18
terra firme	L2T0500	4958	Vouacapoua americana	40.3	28.8
terra firme	L2T0500	4962	Protium strumosum	10.9	16
terra firme	L2T0500	4964	Carapa guianensis	13.8	18.3
terra firme	L2T0500	4965	Ocotea olivacea	18.9	22
terra firme	L2T0500	4966	Conceveiba guianensis	24.2	16
terra firme	L2T0500	4967	Eugenia cupulata	15.4	19.3
terra firme	L2T0500	4968	Eugenia cupulata	21.1	26.4
terra firme	L2T0500	4969	Eschweilera coriacea	15	20.7
terra firme	L2T0500	4970	Inga melinonis	43	27.5
terra firme	L2T0500	4971	Protium nitidifolium	22.6	28.8
terra firme	L2T0500	4972	Vouacapoua americana	66.3	33.9
terra firme	L2T0500	4973	Protium elegans	14.7	30.49
terra firme	L2T0500	4974	Aparisthmium cordatum	10.2	15.3
terra firme	L2T0500	4975	Eperua sp1	38.7	30.7
terra firme	L2T0500	4976	Eschweilera coriacea	31.4	31.9
terra firme	L2T0500	4977	Tapirira retusa	10.8	18.4
terra firme	L2T0500	4978	Aniba megaphylla	15.9	19.1
terra firme	L2T0500	4979	Micropholis guyanensis	12.8	23.1
terra firme	L2T0500	4980	Pouteria hispida	20.7	25.2
terra firme	L2T0500	4981	Theobroma subincanum	15.2	23.3
terra firme	L2T0500	4982	Lacmellea arborescens	11.8	16.6
terra firme	L2T0500	4983	Ocotea rhynchophylla	12.8	15.8
terra firme	L2T0500	4984	Eugenia cupulata	11.9	15
terra firme	L2T0500	4985	Vouacapoua americana	37.4	33.7
terra firme	L2T0500	4986	Licania prismatocarpa	11.8	16.4
terra firme	L2T0500	4987	Eugenia cupulata	16	17.3
terra firme	L2T0500	4988	Theobroma subincanum	15.7	20.3
terra firme	L2T0500	4989	Mezilaurus itauba	32	25.4
terra firme	L2T0500	4990	Talisia allenii	14.6	14.73
terra firme	L2T0500	4991	Sagotia sp	10.5	13.65
terra firme	L2T0500	4992	Pourouma villosa	10.5	18.14
terra firme	L2T0500	4993	Bowdichia virgilioides	68	33.84
terra firme	L2T0500	4994	Conceveiba guianensis	19	18.67
terra firme	L2T0500	4995	Guarea humaitensis	20.1	14.9
terra firme	L2T0500	4997	Indeterminada indeterminada	13.3	12.19
terra firme	L2T0500	4998	Trichilia areolata	10.6	12.53
terra firme	L2T0500	4999	Rinorea amapensis	10.2	13.22
terra firme	L2T0500	6000	Ocotea rhynchophylla	1.3	3
terra firme	L2T0500	6001	Ocotea rhynchophylla	12.8	14.85
terra firme	L2T0500	6002	Sloanea floribunda	3.4	3.6
terra firme	L2T0500	6003	Unonopsis stipitata	4.5	8.82
terra firme	L2T0500	6004	Eschweilera rankiniae	3.5	5.72
terra firme	L2T0500	6005	Duguetia surinamensis	3.4	6.88
terra firme	L2T0500	6006	Protium robustum	1.4	2.07
terra firme	L2T0500	6007	Eschweilera coriacea	1.9	3.5
terra firme	L2T0500	6008	Fusaea longifolia	3.5	8.7
terra firme	L2T0500	6009	Eschweilera coriacea	1.3	2.35
terra firme	L2T0500	6010	Corythophora alta	1.3	3
terra firme	L2T0500	6011	Eschweilera pedicellata	2.3	3.25
terra firme	L2T0500	6012	Zygia racemosa	3.3	6.5
terra firme	L2T0500	6013	Guarea pubescens	1.5	3.8
terra firme	L2T0500	6014	Eschweilera atropetiolata	2.2	5.3
terra firme	L2T0500	6015	Micropholis guyanensis	2.3	4.9
terra firme	L2T0500	6016	Amaioua guianensis	1.8	3.6
terra firme	L2T0500	6017	Ocotea rhynchophylla	1.6	4.2
terra firme	L2T0500	6018	Duguetia flagellaris	1.6	2.5
terra firme	L2T0500	6019	Chimarrhis turbinata	20.3	16.81
terra firme	L2T0500	6020	Garcinia acuminata	2.5	4.9
terra firme	L2T0500	6021	Simaba cedron	3.2	4.74
terra firme	L2T0500	6022	Guarea pubescens	1.3	3
terra firme	L2T0500	6023	Ocotea cujumary	1	2.45
terra firme	L2T0500	6024	Eugenia patrisii	1.1	2.8
terra firme	L2T0500	6025	Guarea pubescens	1.7	3.55
terra firme	L2T0500	6026	Inga paraensis	18.4	22.78
terra firme	L2T0500	6027	Talisia allenii	6.3	9.05
terra firme	L2T0500	6028	Guarea sp1	1.5	2.65
terra firme	L2T0500	6029	Mabea piriri	4.5	11.42
terra firme	L2T0500	6030	Geonoma deversa	1.3	3.6
terra firme	L2T0500	6031	Brosimum rubescens	1.6	2.75
terra firme	L2T0500	6032	Protium robustum	2.5	4.4
terra firme	L2T0500	6033	Eschweilera coriacea	2.4	4.3
terra firme	L2T0500	6034	Hirtella rodriguesii	2.8	6.44
terra firme	L2T0500	6035	Eschweilera wachenheimii	2.2	5.37
terra firme	L2T0500	6036	Ocotea rhynchophylla	4.9	8.25
terra firme	L2T0500	6037	Helianthostylis rhynchophylla	1.1	2.5
terra firme	L2T0500	6039	Pourouma cecropiifolia	3.8	7.68
terra firme	L2T0500	6040	Guarea pubescens	1.3	3
terra firme	L2T0500	6041	Cupania scrobiculata	1.1	3
terra firme	L2T0500	6042	Hirtella hispidula	3.1	6.3
terra firme	L2T0500	6043	Siparuna decipiens	2	2.7
terra firme	L2T0500	6044	Couepia robusta	8.7	15.18
terra firme	L2T0500	6045	Myrcia grandis	1.2	2.8
terra firme	L2T0500	6046	Guateria olivacea	7.2	11.92
terra firme	L2T0500	6047	Guarea humaitensis	1.2	4
terra firme	L2T0500	6048	Duguetia cadaverica	1.8	3.2
terra firme	L2T0500	6049	Duguetia cadaverica	2.7	3.8
terra firme	L2T0500	6050	Duguetia surinamensis	1	3.85
terra firme	L2T0500	6051	Guarea humaitensis	1.5	3.7
terra firme	L2T0500	6052	Eugenia florida	2.4	3.9
terra firme	L2T0500	6053	Himatanthus sucuuba	2	4.1
terra firme	L2T0500	6054	Protium grandifolium	1.3	3.6
terra firme	L2T0500	6055	Licania latifolia	13.3	13.09
terra firme	L2T0500	6056	Eugenia cupulata	1.9	4.5
terra firme	L2T0500	6057	Eugenia agathopoda	2.1	4
terra firme	L2T0500	6058	Micropholis guyanensis	2.9	6.78
terra firme	L2T0500	6059	Duguetia cadaverica	18.1	22.44
terra firme	L2T0500	6060	Duguetia cadaverica	1.5	3
terra firme	L2T0500	6061	Myrcia sp1	8.2	12.32
terra firme	L2T0500	6062a	Eugenia florida	1.4	2.8
terra firme	L2T0500	6063	Buchenavia grandis	12.3	19.74
terra firme	L2T0500	6064	Protium pilosum	1.5	2.8
terra firme	L2T0500	6065	Mabea piriri	1.8	4.7
terra firme	L2T0500	6067	Hirtella rodriguesii	2.9	4.7
terra firme	L2T0500	6068	Eugenia florida	3.6	5.5
terra firme	L2T0500	6069	Eschweilera pedicellata	6.1	14.99
terra firme	L2T0500	6070	Duguetia stelechantha	2.9	4.55
terra firme	L2T0500	6071	Ocotea rhynchophylla	3.3	6.51
terra firme	L2T0500	6072	Ocotea amazonica	3.9	7.7
terra firme	L2T0500	6073	Conceveiba guianensis	5.5	9.2
terra firme	L2T0500	6074	Miconia traillii	7.6	12.64
terra firme	L2T0500	6075	Eugenia cupulata	1.1	2.5
terra firme	L2T0500	6076	Theobroma subincanum	1.5	3.55
terra firme	L2T0500	6077	Eugenia cupulata	1.3	2.5
terra firme	L2T0500	6078	Miconia tetrasperma	2.4	4.5
terra firme	L2T0500	6079	Helianthostylis sprucei	1.1	2.9
terra firme	L2T0500	6080	Eugenia florida	1.5	2.7
terra firme	L2T0500	6081	Garcinia acuminata	1	2.4
terra firme	L2T0500	6083	Ocotea percurrens	8.7	13.6
terra firme	L2T0500	6084	Tapirira guianensis	2.3	4.3
terra firme	L2T0500	6085	Eugenia tapacumensis	1.9	3.5
terra firme	L2T0500	6086	Eugenia tapacumensis	1	2.5
terra firme	L2T0500	6087	Ocotea rhynchophylla	8	12.7
terra firme	L2T0500	6088	Ocotea rhynchophylla	3.7	8.2
terra firme	L2T0500	6089	Hirtella rodriguesii	2.9	5.5
terra firme	L2T0500	6091	Piper paraense	1.1	3.1
terra firme	L2T0500	6092	Cremastosperma sp	1.3	2.2
terra firme	L2T0500	6093	Paypayrola grandiflora	10.1	15.9
terra firme	L2T0500	6094	Ocotea rhynchophylla	2.4	4.2
terra firme	L2T0500	6095	Pouteria hispida	2.3	4.5
terra firme	L2T0500	6096	Guarea pubescens	20.6	19.8
terra firme	L2T0500	6097	Protium unifoliolatum	1.7	3.6
terra firme	L2T0500	6098	Neea ovalifolia	1	2.15
terra firme	L2T0500	6099	Eschweilera coriacea	1.3	2.65
terra firme	L2T0500	6100	Sloanea excelsa	12.7	16.3
terra firme	L2T0500	6101	Eschweilera coriacea	2.5	2.5
terra firme	L2T0500	6102	Discophora guianensis	5.6	9.7
terra firme	L2T0500	6103	Myrcia grandis	1.3	2.8
terra firme	L2T0500	6104	Tachigali myrmecophila	2.2	6
terra firme	L2T0500	6105	Micropholis guyanensis	1.5	3.3
terra firme	L2T0500	6106	Pterocarpus rohrii	2.2	5.4
terra firme	L2T0500	6192	Inga alba	23.7	26.5
terra firme	L2T0500	6193	Eperua sp	13.9	22.2
terra firme	L2T0500	6194	Sterculia frondosa	27.2	27.1
terra firme	L2T0500	6195	Ocotea nigrescens	20.6	24.5
terra firme	L2T0500	6196	Eperua sp	15.2	20.9
terra firme	L2T0500	6197	Sextonia rubra	65.6	42
terra firme	L2T0500	6198	Eschweilera coriacea	10.8	15.1
terra firme	L2T0500	6199	Trichilia areolata	11.5	17.5
terra firme	L2T0500	6200	Pouteria fulva	16.9	23.59
terra firme	L2T0500	6201	Mouriri trunciflora	12.5	16.91
terra firme	L2T0500	6202	Eugenia sp	13.9	17.19
terra firme	L2T0500	6203	Micropholis guyanensis	21.6	21.56
terra firme	L2T0500	6204	Tachigali myrmecophila	40.3	30.79
terra firme	L2T0500	6205	Annona sp1	14.3	23.04
terra firme	L2T0500	6206	Tachigali myrmecophila	26.4	31.27
terra firme	L2T0500	6207	Eugenia sp2	11.2	15.03
terra firme	L2T0500	6208	Carapa guianensis	36.6	27.93
terra firme	L2T0500	6209	Sloanea latifolia	11.3	13.96
terra firme	L2T0500	6210	Dimorphandra pennigera	28.3	30.42
terra firme	L2T0500	6211	Guateria olivacea	12.2	14.25
terra firme	L2T0500	6214	Pouteria elegans	20.8	22.32
terra firme	L2T0500	6215	Pouteria peruviensis	51.5	36.95
terra firme	L2T0500	6216	Pouteria platyphylla	15.2	19.02
terra firme	L2T0500	6217	Eugenia cupulata	11.6	16.83
terra firme	L2T0500	6218	Eschweilera coriacea	11.8	18.03
terra firme	L2T0500	6219	Eschweilera coriacea	22.8	22.85
terra firme	L2T0500	6220	Protium polybotryum	12.8	19.78
terra firme	L2T0500	6221	Pouteria elegans	59.3	42.15
terra firme	L2T0500	6222	Brosimum guianense	15.7	22.95
terra firme	L2T0500	6223	Protium polybotryum	15.5	23.78
terra firme	L2T0500	6224	Lecythis lurida	28.4	30.01
terra firme	L2T0500	6225	Eschweilera nana	16.6	18.68
terra firme	L2T0500	6226	Vouacapoua americana	45.9	29.6
terra firme	L2T0500	6227	Conceveiba guianensis	11	18.84
terra firme	L2T0500	6228	Protium robustum	47.4	26.1
terra firme	L2T0500	6229	Eschweilera nana	12.6	19.9
terra firme	L2T0500	6230	Kutchubaea sericantha	18.6	17.8
terra firme	L2T0500	6231	Siparuna decipiens	29.5	26.3
terra firme	L2T0500	6232	Eschweilera nana	17.8	23
terra firme	L2T0500	6233	Vouacapoua americana	79.8	26.2
terra firme	L2T0500	6234	Brosimum rubescens	19.7	25.3
terra firme	L2T0500	6235	Eschweilera coriacea	33.7	26.6
terra firme	L2T0500	6236	Eschweilera coriacea	30.7	24.7
terra firme	L2T0500	6237	Kutchubaea sericantha	13.8	14.4
terra firme	L2T0500	6238	Eschweilera nana	19.3	26.4
terra firme	L2T0500	6239	Micropholis guyanensis	50.1	38.3
terra firme	L2T0500	6240	Lecythis sp2	52.3	41.3
terra firme	L2T0500	6241	Tovomita schomburgkii	10.8	9.4
terra firme	L2T0500	6242	Guateria hypoglauca	28.6	25.1
terra firme	L2T0500	6243	Tachigali myrmecophila	37.7	26.5
terra firme	L2T0500	6312	Eschweilera ovata	37.9	28.7
terra firme	L2T0500	6313	Manilkara bidentata	49	38.9
terra firme	L2T0500	6314	Manilkara huberi	52.5	39.7
terra firme	L2T0500	6315	Pouteria pallens	32.7	28.4
terra firme	L2T0500	6316	Monopteryx inpae	53.5	39.4
terra firme	L2T0500	6317	Vouacapoua americana	57.6	33
terra firme	L2T0500	6318	Manilkara bidentata	58.3	44.1
terra firme	L2T0500	6319	Couma guianensis	54.6	28.9
terra firme	L2T0500	6320	Mouriri collocarpa	28.2	29.6
terra firme	L2T0500	6321	Couepia guianensis	42.7	22.4
terra firme	L2T0500	6322	Sloanea excelsa	46.5	24.3
terra firme	L2T0500	6323	Pouteria peruviensis	38.9	25.2
terra firme	L2T0500	6324	Eperua sp	70.2	37.7
terra firme	L2T0500	6325	Eugenia sp2	29.7	23.1
terra firme	L2T0500	6326	Brosimum parinarioides	66.5	38.7
terra firme	L2T0500	6327	Eschweilera coriacea	52.9	42.68
terra firme	L2T0500	6328	Qualea paraensis	38.9	33.5
terra firme	L2T0500	6329	Brosimum guianense	38.3	34
terra firme	L2T0500	6330	Eperua sp	32.8	34.9
terra firme	L2T0500	6331	Vouacapoua americana	73.6	34.3
terra firme	L2T0500	6332	Pouteria peruviensis	43.1	33.8
terra firme	L2T0500	6333	Dipteryx odorata	40.7	34.5
terra firme	L2T0500	6334	Eschweilera coriacea	38.8	27.7
terra firme	L2T0500	6335	Protium grandifolium	16.3	18.7
terra firme	L2T0500	6336	Ocotea percurrens	26.4	26.8
terra firme	L2T0500	6337	Pouteria pallens	39.7	35.3
terra firme	L2T0500	6338	Pouteria elegans	32.3	21.1
terra firme	L2T0500	6339	Eschweilera ovata	44.2	27.1
terra firme	L2T0500	6340	Manilkara huberi	59.2	29.5
terra firme	L2T0500	6341	Monopteryx inpae	46.4	32.5
terra firme	L2T0500	6342	Manilkara huberi	61.9	33.7
terra firme	L1T2500	6354	Couepia guianensis	1.16	1.2
terra firme	L1T2500	6355	Lecythis chartacea	1.454	2.5
terra firme	L1T2500	6356	Sorocea guilleminiana	3.97	5.2
terra firme	L1T2500	6357	Pouteria erythrochrysa	25.5	28.5
terra firme	L1T2500	6358	Mabea angularis	3.36	8
terra firme	L1T2500	6359	Eugenia cupulata	1.812	3.5
terra firme	L1T2500	6360	Helianthostylis sprucei	1.646	3.5
terra firme	L1T2500	6361	Lacmellea gracilis	1.872	1.58
terra firme	L1T2500	6362	Compsoneura ulei	1.023	2.6
terra firme	L1T2500	6363	Ocotea cujumary	1.038	2
terra firme	L1T2500	6364	Tachigali myrmecophila	10.4	17.3
terra firme	L1T2500	6365	Trichilia schomburgkii	4.12	5.12
terra firme	L1T2500	6366	Trichilia schomburgkii	2.418	3.05
terra firme	L1T2500	6367	Ouratea obovata	1.389	3.1
terra firme	L1T2500	6368	Miconia argyrophylla	1.061	2.7
terra firme	L1T2500	6370	Eschweilera truncata	2.723	4.5
terra firme	L1T2500	6371	Guarea humaitensis	7	8.7
terra firme	L1T2500	6372	Myrcia sp3	1.232	2.48
terra firme	L1T2500	6373	Bactris elegans	1.289	3.7
terra firme	L1T2500	6374	Simaba cedron	1.41	15.3
terra firme	L1T2500	6375	Protium nitidifolium	1.326	2.48
terra firme	L1T2500	6376	Matisia ochrocalyx	3.36	5.1
terra firme	L1T2500	6377	Rhabdodendron amazonicum	1.252	3
terra firme	L1T2500	6378	Eperua sp1	7.8	13.7
terra firme	L1T2500	6379	Cupania sp1	1.176	2
terra firme	L1T2500	6380	Chrysophyllum sanguinolentum	1.98	4.48
terra firme	L1T2500	6381	Swartzia macrophylla	1.093	2.4
terra firme	L1T2500	6382	Ocotea rhynchophylla	13.7	16.5
terra firme	L1T2500	6383	Miconia multiflora	4.9	7.5
terra firme	L1T2500	6385	Mouriri sp	1.581	3.65
terra firme	L1T2500	6386	Matayba arborescens	1.56	3.6
terra firme	L1T2500	6387	Duguetia surinamensis	2.538	4.16
terra firme	L1T2500	6388	Maytenus guianensis	1.532	2.7
terra firme	L1T2500	6389	Manilkara huberi	4.7	7
terra firme	L1T2500	6390	Lecythis chartacea	2.698	4
terra firme	L1T2500	6391	Xylopia calophylla	9.1	13.6
terra firme	L1T2500	6392	Xylopia brasiliensis	14.4	23.5
terra firme	L1T2500	6393	Maytenus guianensis	2.166	3.1
terra firme	L1T2500	6394	Licania impressa	3.463	4.75
terra firme	L1T2500	6395	Aniba terminalis	2.3	5.15
terra firme	L1T2500	6396	Vouacapoua americana	5.087	11.1
terra firme	L1T2500	6397	Ocotea cinerea	2.769	4.5
terra firme	L1T2500	6398	Protium nitidifolium	5.035	9.8
terra firme	L1T2500	6399	Aniba sp	1.446	2.65
terra firme	L1T2500	6400	Eschweilera truncata	2.17	4.3
terra firme	L1T2500	6401	Buchenavia grandis	8.5	12.9
terra firme	L1T2500	6402	Licania longistyla	5.479	9.4
terra firme	L1T2500	6403	Guarea pubescens	3.791	5.65
terra firme	L1T2500	6404	Guateria olivacea	1.559	4.7
terra firme	L1T2500	6405	Cupania sp1	3.201	5.15
terra firme	L1T2500	6406a	Eugenia sp4	1.213	1.9
terra firme	L1T2500	6407	Mouriri sp	2.86	3.3
terra firme	L1T2500	6408	Protium tenuifolium	1.427	3
terra firme	L1T2500	6409	Casearia sp	1.337	2.1
terra firme	L1T2500	6410	Lacistema aggregatum	1.66	3.1
terra firme	L1T2500	6411	Casearia sp	1.838	2.5
terra firme	L1T2500	6412	Licania canescens	6.1	11
terra firme	L1T2500	6414	Lecythis chartacea	6.4	8.1
terra firme	L1T2500	6415	Pogonophora schomburgkiana	7.9	10
terra firme	L1T2500	6416	Ocotea matogrossensis	2.878	4
terra firme	L1T2500	6417	Eschweilera coriacea	1.129	4
terra firme	L1T2500	6418	Brosimum guianense	5.317	5.9
terra firme	L1T2500	6419a	Miconia argyrophylla	20.9	3.4
terra firme	L1T2500	6420	Alibertia myrciifolia	3.191	4.3
terra firme	L1T2500	6421	Myrcia sp1	4.395	5.5
terra firme	L1T2500	6422	Astrocaryum gynacanthum	3.854	4.7
terra firme	L1T2500	6423	Miconia argyrophylla	3.4	5.15
terra firme	L1T2500	6424	Duroia gransabanensis	4.259	6.5
terra firme	L1T2500	6425	Trichilia cipo	2.038	3.7
terra firme	L1T2500	6426	Bocoa alterna	2.773	4.5
terra firme	L1T2500	6427	Sloanea pubescens	1.881	3.5
terra firme	L1T2500	6428	Guarea pubescens	6.4	7.8
terra firme	L1T2500	6429	Protium nitidifolium	1.42	3.7
terra firme	L1T2500	6430	Indeterminada indeterminada	1.341	2.15
terra firme	L1T2500	6431	Fusaea longifolia	3.334	5.5
terra firme	L1T2500	6432	Picramnia sp	6.6	10
terra firme	L1T2500	6433	Protium pilosum	1.822	3.2
terra firme	L1T2500	6434	Myrcia grandis	2.072	4
terra firme	L1T2500	6435a	Guateria olivacea	2.04	4
terra firme	L1T2500	6436	Chrysophyllum argenteum	1.354	3.5
terra firme	L1T2500	6437	Neea floribunda	3.577	3.95
terra firme	L1T2500	6438	Protium pilosum	2.137	4.6
terra firme	L1T2500	6439a	Tabernaemontana undulata	2.252	4.55
terra firme	L1T2500	6440	Tabernaemontana undulata	3.767	4.65
terra firme	L1T2500	6441	Miconia argyrophylla	3.4	5.8
terra firme	L1T2500	6442	Qualea paraensis	7.7	8.6
terra firme	L1T2500	6443	Simaba cedron	8.7	13.6
terra firme	L1T2500	6444	Heisteria barbata	5.9	6.7
terra firme	L1T2500	6445	Fusaea longifolia	3.414	7.3
terra firme	L1T2500	6447	Protium unifoliolatum	1.059	2.65
terra firme	L1T2500	6448	Sterculia frondosa	3.547	5.6
terra firme	L1T2500	6449	Tabernaemontana undulata	6	6.7
terra firme	L1T2500	6450	Inga cayennensis	16	22.3
terra firme	L1T2500	6451	Tabernaemontana undulata	2.685	3.7
terra firme	L1T2500	6452	Pourouma villosa	3.727	6.5
terra firme	L1T2500	6453	Ocotea sp	10.1	12.6
terra firme	L1T2500	6454	Couepia guianensis	3.057	6.55
terra firme	L1T2500	6455	Pourouma villosa	5.4	7.4
terra firme	L1T2500	6456	Pourouma villosa	2.587	5.75
terra firme	L1T2500	6657	Buchenavia sp	14.9	18.4
terra firme	L1T2500	6658	Osteophloeum platyspermum	21.6	26
terra firme	L1T2500	6659	Tapura sp	12.4	14.7
terra firme	L1T2500	6660	Eugenia tapacumensis	11.4	18.2
terra firme	L1T2500	6661	Stryphnodendron racemiferum	26.3	26.1
terra firme	L1T2500	6664	Lacunaria jenmanii	13.1	9.2
terra firme	L1T2500	6665	Protium decandrum	25.3	24.8
terra firme	L1T2500	6666	Guateria sp	13.1	17
terra firme	L1T2500	6667	Carapa guianensis	49.3	19.1
terra firme	L1T2500	6668	Ocotea cinerea	86.6	35.1
terra firme	L1T2500	6669	Thyrsodium paraense	16.7	21.5
terra firme	L1T2500	6670	Manilkara huberi	68.4	51.9
terra firme	L1T2500	6671	Siparuna decipiens	26.2	25.6
terra firme	L1T2500	6672	Siparuna decipiens	11.5	20.1
terra firme	L1T2500	6674	Duroia macrophylla	16.1	17.9
terra firme	L1T2500	6675	Pouteria virescens	40.8	49.9
terra firme	L1T2500	6676	Helicostylis scabra	11.2	12.68
terra firme	L1T2500	6677	Vouacapoua americana	49.9	32
terra firme	L1T2500	6679	Simaba cedron	10.8	12.8
terra firme	L1T2500	6680	Pterocarpus rohrii	36.6	35.7
terra firme	L1T2500	6681	Fusaea longifolia	9.7	16
terra firme	L1T2500	6682	Tachigali myrmecophila	16.7	21.5
terra firme	L1T2500	6683	Pseudopiptadenia suaveolens	29.8	43.1
terra firme	L1T2500	6684	Vouacapoua americana	34.6	26.9
terra firme	L1T2500	6685	Lacistema grandifolium	9.7	13.5
terra firme	L1T2500	6686	Ampelocera edentula	23.4	26.4
terra firme	L1T2500	6687	Chrysophyllum argenteum	10.4	12.1
terra firme	L1T2500	6688	Protium robustum	14.8	15.8
terra firme	L1T2500	6689	Ocotea puberula	13.2	21.3
terra firme	L1T2500	6690	Simaba cedron	20	22.9
terra firme	L1T2500	6691	Ocotea percurrens	34.7	30.3
terra firme	L1T2500	6692	Pourouma tomentosa	60.5	47.6
terra firme	L1T2500	6693	Mabea speciosa	10.7	23.9
terra firme	L1T2500	6694	Aspidosperma desmanthum	10.2	15.9
terra firme	L1T2500	6695	Protium nitidum	11.2	19.5
terra firme	L1T2500	6696	Pouteria hispida	20.3	25.9
terra firme	L1T2500	6697	Micropholis guyanensis	57.5	47.3
terra firme	L1T2500	6699	Chrysophyllum colombianum	33	33.3
terra firme	L1T2500	6700	Hebepetalum humiriifolium	10.1	18
terra firme	L1T2500	6701	Eugenia longiracemosa	18.2	24.5
terra firme	L1T2500	6702	Protium rubrum	12	17.7
terra firme	L1T2500	6703	Simarouba amara	19.6	26.6
terra firme	L1T2500	6704	Inga thibaudiana	10.4	15.5
terra firme	L1T2500	6705	Protium ferrugineum	10.9	16.7
terra firme	L1T2500	6706	Miconia argyrophylla	11.3	16.4
terra firme	L1T2500	6707	Pouteria pallens	39.4	32.8
terra firme	L1T2500	6708	Helicostylis scabra	11.1	16.1
terra firme	L1T2500	6709	Protium nitidifolium	12.7	16.5
terra firme	L1T2500	6710	Inga macrophylla	11.4	18.1
terra firme	L1T2500	6711	Virola michelii	13.7	16.6
terra firme	L1T2500	6712	Guateria citriodora	17.5	14.2
terra firme	L1T2500	6713	Eschweilera coriacea	19.8	19.5
terra firme	L1T2500	6714	Protium robustum	20.8	19
terra firme	L1T2500	6715	Ocotea rhynchophylla	11.4	13.3
terra firme	L1T2500	6716	Pouteria pallens	29	13
terra firme	L1T2500	6717	Pouteria eugeniifolia	9.6	12.7
terra firme	L1T2500	6718	Pouteria petiolata	14.4	11.1
terra firme	L1T2500	6719	Chrysophyllum sanguinolentum	40.2	20
terra firme	L1T2500	6720	Corythophora amapaensis	31.2	34.3
terra firme	L1T2500	6721	Protium nitidifolium	50.4	39
terra firme	L1T2500	6722	Siparuna decipiens	12.6	14.4
terra firme	L1T2500	6723	Chrysophyllum colombianum	24.3	20.2
terra firme	L1T2500	6724	Eugenia sp1	10.2	16.3
terra firme	L1T2500	6725	Protium giganteum	11.9	17
terra firme	L1T2500	6726	Theobroma subincanum	13.6	13.3
terra firme	L1T2500	6727	Vouacapoua americana	44.5	35.6
terra firme	L1T2500	6728	Dystovomita brasiliensis	17.2	23.2
terra firme	L1T2500	6729	Lacmellea arborescens	14.3	14.6
terra firme	L1T2500	6730	Annona sp1	10.2	15.7
terra firme	L1T2500	6731	Thyrsodium spruceanum	24.8	15.8
terra firme	L1T2500	6732	Brosimum guianense	15.5	15.7
terra firme	L1T2500	6733	Pouteria fulva	12.3	9.6
terra firme	L1T2500	6734	Cecropia sciadophylla	44.1	39.1
terra firme	L1T2500	6735	Matisia sp1	11.3	11.8
terra firme	L1T2500	6736	Protium nitidifolium	13.3	7.8
terra firme	L1T2500	6737	Protium robustum	11.2	16
terra firme	L2T4500	6836	Sloanea pubescens	24.2	30.88
terra firme	L2T4500	6837	Talisia veraluciana	4.127	7.79
terra firme	L2T4500	6838	Bocageopsis multiflora	5.6	10.53
terra firme	L2T4500	6839	Picramnia juniniana	1.67	3.65
terra firme	L2T4500	6840	Swartzia recurva	1.58	3.2
terra firme	L2T4500	6841	Xylopia calophylla	1.895	3.5
terra firme	L2T4500	6842	Eschweilera ovata	10.3	12.77
terra firme	L2T4500	6843	Lecythis poiteaui	26.2	29.53
terra firme	L2T4500	6844	Duguetia cadaverica	1.664	2.95
terra firme	L2T4500	6845	Lecythis chartacea	3.07	5.37
terra firme	L2T4500	6846	Tovomita schomburgkii	1.141	2.5
terra firme	L2T4500	6847	Lecythis chartacea	3.54	5.83
terra firme	L2T4500	6848	Duguetia surinamensis	1.669	3.45
terra firme	L2T4500	6849	Ocotea nigrescens	1.33	2.85
terra firme	L2T4500	6850	Tabernaemontana undulata	3.57	4
terra firme	L2T4500	6851	Duguetia cadaverica	1.861	2.9
terra firme	L2T4500	6852	Eschweilera ovata	5.2	8.06
terra firme	L2T4500	6853	Lecythis poiteaui	19.3	22.49
terra firme	L2T4500	6854	Guarea pubescens	4.192	4.83
terra firme	L2T4500	6855	Duguetia cadaverica	1.732	4
terra firme	L2T4500	6856	Protium tenuifolium	8.6	21.02
terra firme	L2T4500	6857	Lecythis chartacea	2.63	4.27
terra firme	L2T4500	6858	Tovomita schomburgkii	3.311	5.46
terra firme	L2T4500	6859	Lecythis chartacea	2.075	2
terra firme	L2T4500	6860	Lecythis chartacea	1.026	2.2
terra firme	L2T4500	6861	Lacmellea gracilis	2.911	4.44
terra firme	L2T4500	6862	Quiina negrensis	1.071	2.3
terra firme	L2T4500	6863	Manilkara huberi	76.6	49.01
terra firme	L2T4500	6864	Lecythis chartacea	17.2	22.29
terra firme	L2T4500	6865	Toulicia pulvinata	12	2.3
terra firme	L2T4500	6866	Ocotea percurrens	1.369	3.5
terra firme	L2T4500	6867	Duguetia cadaverica	1.441	2.25
terra firme	L2T4500	6868	Licania heteromorpha	2.127	4.05
terra firme	L2T4500	6869	Lecythis poiteaui	2.224	4.89
terra firme	L2T4500	6870	Hebepetalum humiriifolium	1.445	4.15
terra firme	L2T4500	6871	Sterculia pruriens	5.5	7.48
terra firme	L2T4500	6872	Aniba panurensis	1.339	2.4
terra firme	L2T4500	6873	Ocotea matogrossensis	2.194	2.4
terra firme	L2T4500	6874	Tabernaemontana undulata	5.1	5.6
terra firme	L2T4500	6875	Guateria olivacea	1.698	4
terra firme	L2T4500	6876	Lecythis chartacea	2.886	2.95
terra firme	L2T4500	6877	Pouteria bilocularis	1.957	4.77
terra firme	L2T4500	6878	Protium elegans	1.45	1.35
terra firme	L2T4500	6879	Sterculia pruriens	4.9	7.05
terra firme	L2T4500	6880A	Tabernaemontana undulata	2.139	3.5
terra firme	L2T4500	6881	Swartzia panacoco	3	5.2
terra firme	L2T4500	6882	Duguetia cadaverica	1.63	2.5
terra firme	L2T4500	6883A	Duguetia cadaverica	3.53	2.1
terra firme	L2T4500	6884	Pouteria durlandii	1.111	1.75
terra firme	L2T4500	6885	Eschweilera pedicellata	2.256	4.49
terra firme	L2T4500	6886	Lecythis chartacea	4.742	7.24
terra firme	L2T4500	6887	Sloanea rufa	1.353	2.55
terra firme	L2T4500	6888	Xylopia calophylla	2.433	4.73
terra firme	L2T4500	6889	Aniba panurensis	1.183	3
terra firme	L2T4500	6890	Licania heteromorpha	1.138	3
terra firme	L2T4500	6891	Aniba panurensis	1.627	2.7
terra firme	L2T4500	6892	Lecythis chartacea	2.857	4.05
terra firme	L2T4500	6893	Guapira sp1	1.115	2.95
terra firme	L2T4500	6894	Mouriri ficoides	1.562	3.95
terra firme	L2T4500	6895	Helicostylis tomentosa	13.7	21.2
terra firme	L2T4500	6896	Copaifera langsdorffii	3.786	7.12
terra firme	L2T4500	6897	Tabernaemontana undulata	3.786	3.25
terra firme	L2T4500	6898	Cordia naidophila	4.557	8.17
terra firme	L2T4500	6899	Annona amazonica	10.6	10.39
terra firme	L2T4500	6900	Duguetia cadaverica	1.35	2.3
terra firme	L2T4500	6901	Lacunaria macrostachya	3.015	7.09
terra firme	L2T4500	6902	Cordia naidophila	4.022	6.13
terra firme	L2T4500	6903	Pouteria pallens	38.8	30.88
terra firme	L2T4500	6904	Lecythis poiteaui	1.994	3.5
terra firme	L2T4500	6905	Lecythis chartacea	2.314	5.98
terra firme	L2T4500	6906	Guateria sp	1.559	2.75
terra firme	L2T4500	6907	Thyrsodium spruceanum	3.067	5.56
terra firme	L2T4500	6908	Duguetia cadaverica	4.784	4.58
terra firme	L2T4500	6909	Garcinia acuminata	5.263	9.1
terra firme	L2T4500	6910	Palicourea egena	1.339	3.55
terra firme	L2T4500	6912	Protium tenuifolium	1.94	3.98
terra firme	L2T4500	6913	Siparuna decipiens	9.5	12.4
terra firme	L2T4500	6914	Tapura guianensis	1.49	2.45
terra firme	L2T4500	6915	Lecythis chartacea	39.9	24.7
terra firme	L2T4500	6916	Ocotea percurrens	1.14	2.1
terra firme	L2T4500	6917	Duguetia cadaverica	1.711	2.15
terra firme	L2T4500	6918	Mabea piriri	2.825	7.5
terra firme	L2T4500	6919	Swartzia lamellata	3.882	6.7
terra firme	L2T4500	6920	Protium rubrum	2.03	6.6
terra firme	L2T4500	6921	Annona sp1	1.881	4.88
terra firme	L2T4500	6922	Chrysophyllum colombianum	1.606	4
terra firme	L2T4500	6923	Micropholis guyanensis	1.242	2.55
terra firme	L2T4500	6924	Protium rubrum	2.148	3.9
terra firme	L2T4500	6925	Protium rubrum	2.921	4.93
terra firme	L2T4500	6926	Duguetia surinamensis	2.184	4
terra firme	L2T4500	6927	Duroia gransabanensis	1.063	2.3
terra firme	L2T4500	6928	Cordia naidophila	9.6	10.2
terra firme	L2T4500	6929	Duguetia cadaverica	3.373	3.5
terra firme	L2T4500	6930	Brosimum guianense	6.1	7.8
terra firme	L2T4500	6931	Duroia gransabanensis	1.432	1.75
terra firme	L2T4500	6933	Protium rubrum	1.787	2.4
terra firme	L2T4500	6934	Eschweilera ovata	9.7	15.9
terra firme	L2T4500	6935	Mabea speciosa	5.352	5.07
terra firme	L2T4500	6936	Lecythis chartacea	1.111	3.4
terra firme	L2T4500	6937	Indeterminada indeterminada	1.811	1.6
terra firme	L2T4500	6938	Cheiloclinium hippocrateoides (Peyr.) A.C. Sm.	1.651	1.8
terra firme	L2T4500	7084	Eschweilera ovata	18.5	28.5
terra firme	L2T4500	7085	Lecythis chartacea	16.3	24.78
terra firme	L2T4500	7086	Eschweilera ovata	11	15.69
terra firme	L2T4500	7087	Protium gallosum	25.3	16.96
terra firme	L2T4500	7088	Minquartia guianensis	27	25.66
terra firme	L2T4500	7089	Aniba rosaeodora	35.3	31.19
terra firme	L2T4500	7090	Buchenavia congesta	11.3	13.98
terra firme	L2T4500	7091	Eschweilera ovata	13.8	24.11
terra firme	L2T4500	7092	Diospyros cavalcantei	35.6	38.97
terra firme	L2T4500	7093	Protium trifoliolatum	37.7	30.07
terra firme	L2T4500	7094	Siparuna decipiens	10.1	18.22
terra firme	L2T4500	7095	Eschweilera ovata	23.9	31.12
terra firme	L2T4500	7096	Eschweilera sp	10.7	22.16
terra firme	L2T4500	7097	Chrysophyllum prieurii	48.8	49.04
terra firme	L2T4500	7098	Simaba cedron	14.1	15.08
terra firme	L2T4500	7099	Pseudolmedia laevis	17.4	24.06
terra firme	L2T4500	7100	Toulicia guianensis	18.9	21.34
terra firme	L2T4500	7101	Lueheopsis rosea	35.8	37
terra firme	L2T4500	7102	Vouacapoua americana	52.3	35
terra firme	L2T4500	7103	Siparuna decipiens	12	17.5
terra firme	L2T4500	7104	Eschweilera coriacea	22.5	28.2
terra firme	L2T4500	7105	Siparuna sp	11.6	18.9
terra firme	L2T4500	7106	Simaba cedron	26.9	27.2
terra firme	L2T4500	7107	Myrcia grandis	14.8	26.8
terra firme	L2T4500	7108	Eschweilera sp	24.7	32.7
terra firme	L2T4500	7109	Eschweilera ovata	26	32.7
terra firme	L2T4500	7110	Eschweilera coriacea	22.2	25.5
terra firme	L2T4500	7111	Licania hypoleuca	62	43
terra firme	L2T4500	7112	Lecythis chartacea	13.5	21.8
terra firme	L2T4500	7113	Theobroma subincanum	13.4	22
terra firme	L2T4500	7114	Vouacapoua americana	26.6	25
terra firme	L2T4500	7115	Lecythis chartacea	14.1	22.3
terra firme	L2T4500	7116	Lecythis chartacea	17.21	22.1
terra firme	L2T4500	7117	Vouacapoua americana	29.8	27.9
terra firme	L2T4500	7118	Eschweilera ovata	10.7	16
terra firme	L2T4500	7119	Lecythis chartacea	14.8	20.8
terra firme	L2T4500	7120	Minquartia guianensis	24	23
terra firme	L2T4500	7121	Eschweilera coriacea	29.2	29.2
terra firme	L2T4500	7123	Guateria olivacea	13.9	18.5
terra firme	L2T4500	7124	Eschweilera sp	10.8	16
terra firme	L2T4500	7125	Pourouma villosa	23.8	25.6
terra firme	L2T4500	7126	Manilkara huberi	59.3	45.1
terra firme	L2T4500	7127	Bocageopsis pleiosperma	10	13
terra firme	L2T4500	7128	Lecythis chartacea	20.8	19.9
terra firme	L2T4500	7129	Mezilaurus itauba	10.3	13.5
terra firme	L2T4500	7130	Carapa guianensis	37	32
terra firme	L2T4500	7131	Lecythis chartacea	12.8	16.1
terra firme	L2T4500	7132	Virola michelii	10.5	14.8
terra firme	L2T4500	7133	Protium nitidifolium	21.5	28.4
terra firme	L2T4500	7134	Lecythis chartacea	12	15.5
terra firme	L2T4500	7135	Aptandra tubicina	31.9	29.2
terra firme	L2T4500	7136	Protium trifoliolatum	17.5	18.9
terra firme	L2T4500	7137	Eschweilera coriacea	26	25.8
terra firme	L2T4500	7138	Licania canescens	18.5	22.4
terra firme	L2T4500	7139	Eschweilera sp	12.3	22
terra firme	L2T4500	7140	Guateria sp	38.8	29.9
terra firme	L2T4500	7141	Eschweilera sp	17.1	20.2
terra firme	L2T4500	7142	Eschweilera coriacea	22.3	22.3
terra firme	L2T4500	7143	Eugenia agathopoda	10.6	15
terra firme	L2T4500	7144	Simaba cedron	13	18.1
terra firme	L2T4500	7145	Chrysophyllum colombianum	37.5	24.8
terra firme	L2T4500	7146	Lecythis poiteaui	18.9	24.8
terra firme	L2T4500	7147	Eschweilera ovata	18.5	22.1
terra firme	L2T4500	7149	Bocageopsis pleiosperma	16	14.1
terra firme	L2T4500	7150	Annona sp1	14.9	23.3
terra firme	L2T4500	7151	Annona sp1	13.7	18.9
terra firme	L2T4500	7152	Protium polybotryum	26.4	34.4
terra firme	L2T4500	7154	Pouteria virescens	49.3	43.4
terra firme	L2T4500	7155	Hebepetalum humiriifolium	21.9	33.7
terra firme	L2T4500	7156	Lecythis chartacea	15.2	19.1
terra firme	L2T4500	7157	Eschweilera ovata	20	28.7
terra firme	L2T4500	7158	Lecythis chartacea	16.7	25.8
terra firme	L2T4500	7159	Minquartia guianensis	21.5	25.5
terra firme	L2T4500	7160	Bocageopsis pleiosperma	14.1	22.2
terra firme	L2T4500	7161	Pouteria campanulata	20.6	22
terra firme	L2T4500	7162	Vouacapoua americana	45.5	17
terra firme	L2T4500	7163	Vouacapoua americana	56.9	35.8
terra firme	L2T4500	7164	Corythophora rimosa	52.5	37.4
terra firme	L2T4500	7165	Vouacapoua americana	38	25.6
terra firme	L2T4500	7166	Eschweilera coriacea	30.1	32.7
terra firme	L2T4500	7167	Pouteria erythrochrysa	14.8	22.4
terra firme	L2T4500	7168	Siparuna sp	20	22.2
terra firme	L2T4500	7169	Matisia sp1	13.1	16.2
terra firme	L2T4500	7170	Neea floribunda	11.3	16
terra firme	L2T4500	7171	Unonopsis duckei	9.8	12.47
terra firme	L2T4500	7172	Couepia guianensis	13.4	18.58
terra firme	L2T4500	7173	Vouacapoua americana	42.2	29.89
terra firme	L2T4500	7174	Bocageopsis multiflora	14.2	22.68
terra firme	L2T4500	7175	Hebepetalum humiriifolium	32.4	36.34
terra firme	L2T4500	7176	Licania canescens	10.5	18.88
terra firme	L2T4500	7177	Protium trifoliolatum	10.7	15.14
terra firme	L2T4500	7178	Minquartia guianensis	29.3	23.04
terra firme	L2T4500	7179	Protium grandifolium	12.8	17.65
terra firme	L2T4500	7180	Pouteria hispida	32.3	18.34
terra firme	L2T4500	7181	Eschweilera sp	13.4	18.57
terra firme	L2T4500	7182	Jacaranda copaia	48.3	31.12
terra firme	L2T4500	7183	Chrysophyllum pomiferum	32.5	28.79
terra firme	L2T4500	7184	Eschweilera coriacea	12.9	16.06
terra firme	L2T4500	7185	Vouacapoua americana	51.8	34.09
terra firme	L2T4500	7186	Eschweilera ovata	14.7	25.2
terra firme	L2T4500	7187	Simaba cedron	9.5	8.07
terra firme	L2T4500	7188	Eschweilera ovata	20	26.73
terra firme	L2T4500	7189	Minquartia guianensis	10.8	14.77
terra firme	L2T4500	7190	Chrysophyllum colombianum	19.8	20.12
terra firme	L2T4500	7192	Thyrsodium spruceanum	23.5	26.32
terra firme	L2T4500	7193	Mezilaurus itauba	30.3	27.79
terra firme	L2T4500	7194	Lacmellea arborescens	15.9	19.18
terra firme	L2T4500	7195	Pouteria engleri	35.3	35.1
terra firme	L2T4500	7196	Diospyros carbonaria	13.5	19.3
terra firme	L2T4500	7197	Eschweilera coriacea	17	18
terra firme	L2T4500	7198	Eschweilera ovata	19.2	19.6
terra firme	L2T4500	7199	Lecythis chartacea	12.5	18
terra firme	L2T4500	7200	Eschweilera ovata	27.8	25.5
terra firme	L2T4500	7201	Lecythis chartacea	12.9	14
terra firme	L2T4500	7202	Vouacapoua americana	19.5	18.7
terra firme	L2T4500	7203	Simaba cedron	16.9	24.8
terra firme	L2T4500	7204	Iryanthera juruensis	14	19.3
terra firme	L2T4500	7205	Pouteria elegans	15.3	18.9
terra firme	L2T4500	7206	Eschweilera ovata	28.1	22.4
terra firme	L2T4500	7207	Ocotea matogrossensis	24.9	29.7
terra firme	L2T4500	7209	Lecythis chartacea	14	18.1
terra firme	L2T4500	7210	Bocageopsis pleiosperma	13.4	16
terra firme	L2T4500	7211	Eschweilera sp	11.7	17.3
terra firme	L2T4500	7212	Garcinia macrophylla	10.7	16.2
terra firme	L2T4500	7213	Vouacapoua americana	39.9	23.3
terra firme	L2T4500	7214	Chrysophyllum colombianum	26.3	13.1
terra firme	L2T4500	7215	Eschweilera coriacea	37.4	30.3
terra firme	L2T4500	7216	Unonopsis duckei	10.8	17.9
terra firme	L2T4500	7217	Sloanea floribunda	12.9	17.1
terra firme	L2T4500	7218	Simaba cedron	13.2	23.3
terra firme	L2T4500	7219	Eschweilera sp	11.4	17.4
terra firme	L2T4500	7220	Vouacapoua americana	31.8	30.4
terra firme	L2T4500	7221	Endopleura uchi	36.9	30
terra firme	L2T4500	7222	Pouteria pallens	38.2	30.5
terra firme	L2T4500	7223	Vouacapoua americana	28.9	25.7
terra firme	L2T4500	7224	Eschweilera coriacea	11.6	17.3
terra firme	L2T4500	7225	Tovomita sp	11.1	19.6
terra firme	L2T4500	7226	Micropholis guyanensis	10.1	15.5
terra firme	L2T4500	7227	Eschweilera ovata	11.4	15.3
terra firme	L2T4500	7228	Protium trifoliolatum	17.6	21
terra firme	L2T4500	7229	Corythophora amapaensis	19.2	25
terra firme	L2T4500	7230	Garcinia acuminata	10.2	17.2
terra firme	L2T4500	7231	Vouacapoua americana	55.5	35.8
terra firme	L2T4500	7232	Micropholis guyanensis	22.8	21.7
terra firme	L2T4500	7233	Eschweilera sp	33.4	31.6
terra firme	L2T4500	7234	Eschweilera sp	12.9	18
terra firme	L2T4500	7235	Dialium guianense	50	39.9
terra firme	L2T4500	7236	Chamaecrista negrensis	19.5	25.1
terra firme	L2T4500	7237	Chrysophyllum colombianum	21.6	17.5
terra firme	L2T4500	7238	Minquartia guianensis	20.3	18.8
terra firme	L2T4500	7239	Tovomita sp	12.5	21.3
terra firme	L2T4500	7240	Vouacapoua americana	28.9	22.3
terra firme	L2T4500	7241	Dipteryx sp1	13.8	22
terra firme	L2T4500	7242	Annona sp1	12.5	21.4
terra firme	L2T4500	7243	Manilkara huberi	38.7	38.2
terra firme	L2T4500	7244	Toulicia guianensis	13.5	21.8
terra firme	L2T4500	7245	Eschweilera sp	13.8	21.3
terra firme	L2T4500	7246	Vouacapoua americana	65.4	31.2
terra firme	L2T4500	7247	Bowdichia virgilioides	55.7	35.1
terra firme	L2T4500	7248	Eschweilera ovata	13.8	20.3
terra firme	L2T4500	7249	Pouteria hispida	43.8	28.7
terra firme	L2T4500	7250	Eschweilera ovata	53.1	30.7
terra firme	L2T4500	7251	Chamaecrista negrensis	21.8	28.8
terra firme	L2T4500	7252	Annona sp1	17.3	28.7
terra firme	L2T4500	7253	Vouacapoua americana	58.2	29.4
terra firme	L2T4500	7254	Vouacapoua americana	35	28.8
terra firme	L2T4500	7255	Eschweilera sp	18.5	28
terra firme	L2T4500	7256	Annona sp1	11.5	21
terra firme	L2T4500	7320	Inga alba	81.8	45.7
terra firme	L2T4500	7321	Lecythis chartacea	30.1	32.6
terra firme	L2T4500	7322	Minquartia guianensis	45.9	31
terra firme	L2T4500	7323	Minquartia guianensis	31.9	31.8
terra firme	L2T4500	7324	Eschweilera ovata	34.8	31.2
terra firme	L2T4500	7325	Diospyros cavalcantei	38.8	29.8
terra firme	L2T4500	7326	Carapa guianensis	38.7	34.2
terra firme	L2T4500	7327	Chrysophyllum colombianum	45.4	36.4
terra firme	L2T4500	7328	Manilkara huberi	56.7	31.2
terra firme	L2T4500	7329	Pseudopiptadenia suaveolens	47.9	36.5
terra firme	L2T4500	7330	Guateria citriodora	31.3	32.4
terra firme	L2T4500	7331	Helianthostylis steyermarkii	34.1	32.8
terra firme	L2T4500	7332	Lecythis poiteaui	37.5	32.4
terra firme	L2T4500	7333	Vouacapoua americana	43.6	24.9
terra firme	L2T4500	7334	Eschweilera ovata	42.9	34.3
terra firme	L2T4500	7335	Goupia glabra	50.6	24.4
terra firme	L2T4500	7336	Dialium guianense	48.1	37.8
terra firme	L2T4500	7337	Pouteria engleri	30	27.8
terra firme	L2T4500	7338	Vouacapoua americana	69.5	38.2
terra firme	L2T4500	7339	Vouacapoua americana	69.5	37.5
terra firme	L2T4500	7340	Pouteria elegans	31	25.7
terra firme	L2T4500	7341	Manilkara huberi	60.9	28.7
terra firme	L2T4500	7342	Pseudopiptadenia suaveolens	64.5	37.2
terra firme	L2T4500	7343	Ormosia paraensis	30.4	33.8
terra firme	L2T4500	7344	Lecythis chartacea	29.6	24.2
terra firme	L2T4500	7345	Andira sp	50	32.6
terra firme	L2T4500	7346	Rhodostemonodaphne grandis	30	32.8
terra firme	L2T4500	7347	Protium nitidifolium	28.8	26.8
terra firme	L2T4500	7348	Vouacapoua americana	50.6	33.1
terra firme	L2T4500	7349	Eschweilera coriacea	33.5	28.3
terra firme	L2T4500	7350	Vouacapoua americana	66.6	37.4
terra firme	L2T4500	7351	Pouteria hispida	36.5	21.3
terra firme	L2T4500	7352	Heisteria acuminata	29.9	28.1
terra firme	L2T4500	7353	Tachigali micropetala	55.2	22.9
terra firme	L2T4500	7354	Protium spruceanum	32.8	32.1
terra firme	L2T4500	7355	Vouacapoua americana	36.7	23.4
varzea	MZVT3	10	Licania macrophylla	6.20703	6.1
varzea	MZVT2	100	Mora paraensis	16.8704	17
varzea	MZVT3	1002	Lauraceae sp	9.89941	21.5
varzea	MZVT3	1005	Carapa guianensis	32.9768	18.5
varzea	MZVT3	1007	Vantanea sp	41.2847	21
varzea	MZVT2	101	Vantanea sp	17.889	22
varzea	MZVT3	1010	Licania sp	51.5661	27.7
varzea	MZVT3	1012	Maquira coriacea	49.7517	33
varzea	MZVT3	1013	Pentaclethra macroloba	7.0028	18.2
varzea	MZVT3	1015	Pentaclethra macroloba	30.2394	23
varzea	MZVT3	1016	Pentaclethra macroloba	8.46702	12.5
varzea	MZVT3	1019	Pentaclethra macroloba	30.876	21
varzea	MZVT2	102	Mora paraensis	8.37153	12.1
varzea	MZVT3	1020	Mouriri sp1	16.5202	13.5
varzea	MZVT3	1022	Mora paraensis	6.74815	8.5
varzea	MZVT3	1023	Pentaclethra macroloba	33.0723	18.7
varzea	MZVT3	1026	Mora paraensis	7.5121	6.3
varzea	MZVT3	1027	Swartzia racemosa	36.0326	25.3
varzea	MZVT3	1028	Pentaclethra macroloba	24.2552	15.5
varzea	MZVT2	103	Mora paraensis	25.7194	20.1
varzea	MZVT3	1033	Chrysophyllum excelsum	7.9259	8.2
varzea	MZVT3	1034	Pithecellobium inaequale	11.0453	9.1
varzea	MZVT3	1036	Pithecellobium inaequale	8.88083	3.9
varzea	MZVT3	1037	Mora paraensis	21.8678	21
varzea	MZVT3	1038	Mora paraensis	10.9817	13.2
varzea	MZVT3	1039	Mora paraensis	31.2898	12.3
varzea	MZVT2	104	Mora paraensis	11.9048	14.5
varzea	MZVT3	1040	Mora paraensis	31.3853	23
varzea	MZVT3	1042	Piptadenia viridiflora	9.77209	11
varzea	MZVT3	1043	Pentaclethra macroloba	27.0881	22
varzea	MZVT3	1053	Pterocarpus officinalis	16.5202	8
varzea	MZVT3	1055	Mora paraensis	63.2162	28
varzea	MZVT3	1059	Parinari excelsa	117.201	26.5
varzea	MZVT3	1067	Pentaclethra macroloba	22.8864	13.2
varzea	MZVT3	1085	Swartzia leptopetala	65.6353	24
varzea	MZVT3	1086	Licaria mahuba	10.6952	22
varzea	MZVT3	1094	Pentaclethra macroloba	25.4011	22
varzea	MZVT3	1097	Pentaclethra macroloba	33.5816	22.5
varzea	MZVT3	11	Indeterminada Indeterminada	33.1042	20.5
varzea	MZVT3	1117	Sapium sp	39.5658	21.5
varzea	MZVT3	1120	Licania sp	63.6618	27.7
varzea	MZVT3	1121	Guazuma ulmifolia	21.1994	24.5
varzea	MZVT3	1122	Indeterminada Indeterminada	7.28928	18.5
varzea	MZVT3	1128	Calycophyllum spruceanum	19.5442	21.8
varzea	MZVT2	113	Trichilia sp	6.04787	7
varzea	MZVT3	1131	Spondias mombim	39.4703	19.7
varzea	MZVT3	1133	Virola surinamensis	20.7538	17.5
varzea	MZVT2	114	Pentaclethra macroloba	12.2231	11.6
varzea	MZVT4	1146	Calycophyllum spruceanum	71.3012	16.5
varzea	MZVT4	1155	Ficus maxima	139.451	16.5
varzea	MZVT4	1156	Swartzia racemosa	11.1408	9.7
varzea	MZVT4	1158	Pentaclethra macroloba	22.0907	14.1
varzea	MZVT4	1166	Swartzia racemosa	42.0168	13.1
varzea	MZVT4	1172	Pentaclethra macroloba	20.6901	16
varzea	MZVT4	1174	Virola surinamensis	39.4703	24
varzea	MZVT4	1182	Carapa guianensis	24.669	18.5
varzea	MZVT4	1187	Patinoa paraensis	43.7675	15.8
varzea	MZVT4	1188	Mora paraensis	25.1146	17.5
varzea	MZVT2	119	Licania sp	26.6743	17.12
varzea	MZVT4	1191	Mora paraensis	9.70843	9.1
varzea	MZVT4	1199	Pentaclethra macroloba	28.9343	18.3
varzea	MZVT2	120	Pentaclethra macroloba	23.3002	17.4
varzea	MZVT4	1201	Mora paraensis	63.0889	22.5
varzea	MZVT4	1202	Pentaclethra macroloba	34.0909	15.2
varzea	MZVT4	1205	Mora paraensis	41.3802	16
varzea	MZVT4	1209	Pentaclethra macroloba	35.3641	13.5
varzea	MZVT2	121	Licaria mahuba	14.4831	16.3
varzea	MZVT4	1210	Mora paraensis	81.1688	18.7
varzea	MZVT4	1212	Pentaclethra macroloba	32.6267	18.7
varzea	MZVT4	1214	Socratea exorrhiza	11.9366	17.5
varzea	MZVT4	1216	Licaria mahuba	5.72956	6.7
varzea	MZVT4	1221	Pentaclethra macroloba	19.0667	7.4
varzea	MZVT4	1222	Macrolobium sp	43.29	17.5
varzea	MZVT4	1223	Quararibea guianensis	18.3983	11.5
varzea	MZVT2	123	Trichilia sp	11.7774	15.2
varzea	MZVT4	1231	Socratea exorrhiza	11.6183	12.7
varzea	MZVT4	1232	Spondias mombim	10.2177	10
varzea	MZVT4	1233	Cordia tetrandra	15.9155	10.5
varzea	MZVT4	1237	Chrysophyllum excelsum	28.2659	17.5
varzea	MZVT4	1238	Licaria mahuba	59.3328	15.5
varzea	MZVT2	124	Tarralea oppositifolia	26.6425	7
varzea	MZVT4	1241	Swartzia racemosa	50.5475	17.3
varzea	MZVT4	1246	Quararibea guianensis	8.27604	9.9
varzea	MZVT4	1247	Swartzia racemosa	27.2473	14.9
varzea	MZVT2	125	Patinoa paraensis	36.7329	7.5
varzea	MZVT4	1251	Calyptranthes speciosa	5.09295	6.7
varzea	MZVT4	1252	Eugenia browsnbergii	8.94449	9.5
varzea	MZVT4	1253	Licania macrophylla	15.5971	12
varzea	MZVT4	1254	Eugenia browsnbergii	7.4166	10.1
varzea	MZVT4	1255	Mora paraensis	10.1859	12.5
varzea	MZVT4	1256	Pouteria reticulata	46.1548	25
varzea	MZVT4	1259	Virola surinamensis	33.8681	24
varzea	MZVT4	1260	Eugenia browsnbergii	6.14337	5.5
varzea	MZVT4	1261	Mora paraensis	56.659	26
varzea	MZVT4	1262	Mora paraensis	29.6028	16
varzea	MZVT4	1264	Indeterminada Indeterminada	13.4645	15.6
varzea	MZVT4	1265	Eugenia browsnbergii	16.5521	13.2
varzea	MZVT4	1266	Mora paraensis	6.52534	15.2
varzea	MZVT4	1267	Eugenia browsnbergii	7.95773	9.8
varzea	MZVT4	1268	Licaria mahuba	26.4197	12.8
varzea	MZVT4	1269	Eugenia browsnbergii	12.796	10.9
varzea	MZVT2	127	Mora paraensis	18.6211	18.4
varzea	MZVT4	1270	Swartzia racemosa	38.0061	21
varzea	MZVT4	1272	Mora paraensis	36.6056	19.5
varzea	MZVT4	1273	Pentaclethra macroloba	19.576	13.2
varzea	MZVT4	1276	Licania macrophylla	5.47492	5.6
varzea	MZVT4	1277	Inga sp	25.4966	16
varzea	MZVT4	1278	Patinoa paraensis	32.945	11.5
varzea	MZVT2	128	Mora paraensis	39.4703	15.4
varzea	MZVT4	1281	Mora paraensis	50.9295	28.6
varzea	MZVT4	1282	Pithecellobium inaequale	13.4008	18.5
varzea	MZVT4	1283	Carapa guianensis	11.7774	14.8
varzea	MZVT4	1284	Mora paraensis	5.34759	10.3
varzea	MZVT4	1286	Carapa guianensis	27.0563	23
varzea	MZVT4	1287	Licania macrophylla	7.86224	10.9
varzea	MZVT4	1289	Mora paraensis	5.53858	3.4
varzea	MZVT2	129	Mora paraensis	13.6873	14.7
varzea	MZVT4	1292	Pentaclethra macroloba	35.0777	22
varzea	MZVT4	1294	Patinoa paraensis	22.0588	12.5
varzea	MZVT4	1295	Licania macrophylla	9.10364	11.6
varzea	MZVT4	1296	Macrolobium sp	6.33435	6.1
varzea	MZVT4	1297	Mora paraensis	28.0112	22.5
varzea	MZVT4	1301	Caraipa densiflora	20.5309	11.5
varzea	MZVT4	1305	Mora paraensis	6.65266	6.5
varzea	MZVT4	1306	Eugenia browsnbergii	10.1859	6.5
varzea	MZVT4	1309	Eugenia browsnbergii	6.49351	8
varzea	MZVT2	131	Mora paraensis	34.1546	18.3
varzea	MZVT4	1314	Mora paraensis	47.4281	18.5
varzea	MZVT4	1316	Carapa guianensis	31.0033	15
varzea	MZVT4	1319	Vatairea erythrocarpa	21.0084	20.4
varzea	MZVT4	1320	Pentaclethra macroloba	25.3056	21.2
varzea	MZVT4	1322	Mora paraensis	5.57041	6.4
varzea	MZVT4	1325	Mora paraensis	6.62083	11.4
varzea	MZVT4	1326	Pentaclethra macroloba	31.5126	19.9
varzea	MZVT4	1329	Chrysophyllum excelsum	7.13012	9.7
varzea	MZVT4	1331	Mora paraensis	15.3425	21.1
varzea	MZVT4	1333	Swartzia racemosa	10.1859	13.4
varzea	MZVT4	1334	Mora paraensis	89.4449	37.2
varzea	MZVT4	1337	Sterculia sp	14.4512	17.9
varzea	MZVT4	1338	Virola surinamensis	43.3219	25.3
varzea	MZVT2	134	Mora paraensis	10.2496	8.4
varzea	MZVT4	1341	Eugenia browsnbergii	7.16196	8.4
varzea	MZVT4	1342	Mora paraensis	10.8225	13.5
varzea	MZVT4	1344	Patinoa paraensis	24.2233	14.2
varzea	MZVT4	1345	Tarralea oppositifolia	18.9394	16.4
varzea	MZVT4	1347	Patinoa paraensis	61.4973	20.5
varzea	MZVT4	1349	Licaria mahuba	29.2844	20.3
varzea	MZVT4	1351	Mora paraensis	13.4008	16.4
varzea	MZVT4	1352	Mora paraensis	43.9267	22.1
varzea	MZVT4	1353	Mora paraensis	12.0957	15.4
varzea	MZVT4	1355	Mora paraensis	5.88872	6.7
varzea	MZVT4	1357	Mora paraensis	7.95773	11.3
varzea	MZVT4	1358	Hymenaea intermedia	23.2047	23.4
varzea	MZVT4	1359	Pouteria reticulata	6.01604	6.9
varzea	MZVT2	136	Mora paraensis	41.3802	28.9
varzea	MZVT4	1363	Socratea exorrhiza	12.5414	11.9
varzea	MZVT4	1368	Eugenia browsnbergii	12.0957	16.4
varzea	MZVT4	1369	Quararibea guianensis	17.8253	21
varzea	MZVT4	1370	Mora paraensis	41.9213	24.3
varzea	MZVT4	1373	Patinoa paraensis	32.5949	19.4
varzea	MZVT4	1374	Guarea guidonia	36.9239	23.4
varzea	MZVT4	1376	Socratea exorrhiza	14.6422	16.2
varzea	MZVT4	1377	Mora paraensis	21.9633	16.4
varzea	MZVT4	1378	Pterocarpus officinalis	44.5633	23.3
varzea	MZVT4	1379	Guateria poeppigiana	10.8862	15.3
varzea	MZVT2	138	Pouteria reticulata	43.0991	27.5
varzea	MZVT4	1380	Patinoa paraensis	5.85689	4.2
varzea	MZVT4	1381	Virola surinamensis	38.1971	23.2
varzea	MZVT4	1382	Macrolobium sp	11.1408	14.4
varzea	MZVT4	1383	Macrolobium sp	19.7352	18.4
varzea	MZVT4	1384	Pentaclethra macroloba	26.1013	20.3
varzea	MZVT4	1385	Mora paraensis	29.4754	11.5
varzea	MZVT4	1387	Macrolobium sp	16.0746	21.2
varzea	MZVT4	1389	Pithecellobium inaequale	6.36618	10.3
varzea	MZVT2	139	Pentaclethra macroloba	35.1732	23.2
varzea	MZVT4	1390	Mora paraensis	49.0196	29.3
varzea	MZVT4	1391	Virola surinamensis	7.79857	14.2
varzea	MZVT4	1392	Eugenia browsnbergii	6.74815	13.2
varzea	MZVT4	1393	Mora paraensis	24.9873	20.5
varzea	MZVT4	1394	Macrolobium sp	36.7329	23.1
varzea	MZVT4	1396	Inga sp	5.95238	9.3
varzea	MZVT4	1397	Virola surinamensis	20.0535	23.2
varzea	MZVT4	1398	Mora paraensis	15.1197	17.5
varzea	MZVT4	1399	Mora paraensis	9.48561	15.3
varzea	MZVT1	14	Swartzia racemosa	5.38	7.1
varzea	MZVT2	14	Calycophyllum spruceanum	26.4833	25.2
varzea	MZVT1	14	Mora paraensis	6.68	12.3
varzea	MZVT4	1400	Mora paraensis	51.2796	25.4
varzea	MZVT4	1403	Carapa guianensis	8.43519	13.5
varzea	MZVT4	1404	Virola surinamensis	35.1732	26.3
varzea	MZVT4	1406	Macrolobium sp	31.258	21.1
varzea	MZVT4	1409	Patinoa paraensis	29.7619	21.2
varzea	MZVT2	141	Mora paraensis	49.7199	33
varzea	MZVT4	1411	Licania macrophylla	6.84365	10.4
varzea	MZVT4	1412	Indeterminada Indeterminada	23.4912	12.7
varzea	MZVT4	1414	Swartzia racemosa	23.9687	18.8
varzea	MZVT4	1415	Indeterminada Indeterminada	16.9022	13.7
varzea	MZVT4	1416	Mora paraensis	61.4337	27.1
varzea	MZVT4	1417	Licania macrophylla	8.02139	10.4
varzea	MZVT4	1418	Chrysophyllum excelsum	9.29463	14.3
varzea	MZVT4	1419	Mora paraensis	20.6901	21.1
varzea	MZVT4	1420	Carapa guianensis	23.3957	22.3
varzea	MZVT4	1421	Mora paraensis	12.3822	15.6
varzea	MZVT4	1423	Pentaclethra macroloba	20.2763	22.3
varzea	MZVT4	1424	Licaria mahuba	65.89	27.3
varzea	MZVT4	1425	Inga sp	11.109	15.2
varzea	MZVT4	1426	Swartzia racemosa	17.6662	11.4
varzea	MZVT4	1427	Patinoa paraensis	14.2921	12.3
varzea	MZVT4	1428	Pouteria reticulata	76.3942	38.8
varzea	MZVT4	1429	Macrolobium sp	6.33435	7.3
varzea	MZVT2	143	Mora paraensis	19.194	15.5
varzea	MZVT4	1430	Swartzia racemosa	28.0112	14.5
varzea	MZVT4	1432	Patinoa paraensis	27.6929	19.7
varzea	MZVT4	1433	Patinoa paraensis	26.9926	18.9
varzea	MZVT4	1434	Calycophyllum brasiliensis	7.95773	14.8
varzea	MZVT4	1435	Mora paraensis	60.5106	24
varzea	MZVT4	1437	Virola surinamensis	9.58111	11
varzea	MZVT4	1439	Mora paraensis	14.9605	17.1
varzea	MZVT4	1441	Swartzia sp	36.4464	18.5
varzea	MZVT4	1442	Rinorea lindeniana	7.03463	7.1
varzea	MZVT4	1443	Patinoa paraensis	13.7191	10.6
varzea	MZVT4	1444	Macrolobium sp	52.712	26.8
varzea	MZVT4	1445	Patinoa paraensis	44.5633	19.5
varzea	MZVT4	1447	Patinoa paraensis	17.6662	12.5
varzea	MZVT4	1448	Licaria mahuba	26.1332	19.8
varzea	MZVT4	1450	Patinoa paraensis	28.2977	13.9
varzea	MZVT4	1451	Pouteria reticulata	8.14871	4.6
varzea	MZVT4	1452	Patinoa paraensis	19.9898	13.3
varzea	MZVT4	1453	Virola surinamensis	21.7723	20.9
varzea	MZVT4	1455	Patinoa paraensis	12.1594	11.8
varzea	MZVT4	1456	Patinoa paraensis	6.23886	5.9
varzea	MZVT4	1457	Patinoa paraensis	28.807	12.7
varzea	MZVT4	1458	Pterocarpus officinalis	13.9101	15.2
varzea	MZVT4	1459	Mora paraensis	9.48561	8.8
varzea	MZVT2	146	Pentaclethra macroloba	26.929	5.4
varzea	MZVT4	1461	Mora paraensis	19.6078	22
varzea	MZVT4	1462	Mora paraensis	8.59435	12.5
varzea	MZVT4	1463	Pouteria reticulata	8.62618	10.3
varzea	MZVT4	1464	Licania macrophylla	6.93914	9.7
varzea	MZVT4	1466	Macrolobium sp	42.6534	23
varzea	MZVT4	1467	Eugenia browsnbergii	11.6183	13.5
varzea	MZVT4	1469	Mora paraensis	22.8864	21
varzea	MZVT2	147	Mora paraensis	53.285	31.4
varzea	MZVT4	1470	Patinoa paraensis	14.9924	13.1
varzea	MZVT4	1471	Mora paraensis	6.68449	9.2
varzea	MZVT4	1473	Eugenia browsnbergii	15.5335	13.6
varzea	MZVT4	1474	Pentaclethra macroloba	16.1064	17
varzea	MZVT4	1475	Pouteria reticulata	8.68984	11.5
varzea	MZVT4	1476	Mora paraensis	6.30252	9.7
varzea	MZVT4	1477	Patinoa paraensis	40.3616	18.5
varzea	MZVT2	148	Pentaclethra macroloba	18.9394	15
varzea	MZVT4	1480	Licania macrophylla	40.3298	23
varzea	MZVT4	1482	Macrolobium sp	13.1462	14.5
varzea	MZVT4	1483	Patinoa paraensis	18.4938	12.9
varzea	MZVT4	1487	Vatairea erythrocarpa	81.519	25
varzea	MZVT4	1488	Eugenia browsnbergii	6.93914	37
varzea	MZVT4	1489	Patinoa paraensis	20.4354	13.1
varzea	MZVT2	149	Mora paraensis	6.0797	10
varzea	MZVT4	1490	Patinoa paraensis	34.5365	18.2
varzea	MZVT4	1491	Licania macrophylla	13.4326	19.5
varzea	MZVT4	1492	Carapa guianensis	14.8332	17.1
varzea	MZVT4	1493	Pentaclethra macroloba	33.0723	22.2
varzea	MZVT4	1495	Pentaclethra macroloba	24.7008	19.5
varzea	MZVT4	1496	Mora paraensis	50.9613	17.2
varzea	MZVT4	1499	Hevea brasiliensis	13.2735	14.2
varzea	MZVT1	15	Mora paraensis	5.73	8.7
varzea	MZVT2	150	Mora paraensis	6.77998	9.9
varzea	MZVT4	1500	Inga sp	6.55717	8.9
varzea	MZVT4	1501	Mora paraensis	26.6425	23.1
varzea	MZVT4	1502	Patinoa paraensis	29.1889	15.5
varzea	MZVT4	1504	Pachira aquatica	34.3774	21.5
varzea	MZVT4	1505	Eugenia browsnbergii	11.7456	11
varzea	MZVT4	1506	Calycophyllum brasiliensis	14.7695	12.5
varzea	MZVT4	1508	Hevea brasiliensis	44.2131	24.3
varzea	MZVT2	151	Pentaclethra macroloba	18.8757	17.2
varzea	MZVT4	1510	Sterculia sp	11.4273	15
varzea	MZVT4	1511	Licania macrophylla	5.72956	10.7
varzea	MZVT4	1513	Mora paraensis	28.3295	24.7
varzea	MZVT4	1515	Mora paraensis	8.24421	9.5
varzea	MZVT4	1516	Mora paraensis	6.23886	6.5
varzea	MZVT4	1517	Carapa guianensis	11.2045	14.9
varzea	MZVT4	1519	Patinoa paraensis	36.0963	21.3
varzea	MZVT2	152	Mora paraensis	38.2926	30.2
varzea	MZVT4	1522	Tovomita sp1	5.92055	8.3
varzea	MZVT4	1526	Patinoa paraensis	27.852	17.4
varzea	MZVT4	1527	Mora paraensis	61.7838	28.9
varzea	MZVT4	1528	Swartzia racemosa	11.4273	11.7
varzea	MZVT2	153	Pterocarpus officinalis	13.9738	18.4
varzea	MZVT4	1530	Hymenaea intermedia	22.218	17.7
varzea	MZVT4	1532	Swartzia racemosa	55.0993	25
varzea	MZVT4	1533	Mora paraensis	49.9745	27
varzea	MZVT4	1536	Mora paraensis	31.067	19.5
varzea	MZVT4	1537	Pterocarpus officinalis	35.8734	17.3
varzea	MZVT4	1539	Gustavia hexapetala	15.1197	10.7
varzea	MZVT4	1542	Hevea brasiliensis	35.587	18.3
varzea	MZVT4	1544	Hevea brasiliensis	21.5177	13.3
varzea	MZVT4	1545	Vatairea guianensis	16.5521	13.3
varzea	MZVT4	1547	Patinoa paraensis	13.56	9.8
varzea	MZVT4	1549	Quararibea guianensis	17.4752	10.8
varzea	MZVT2	155	Mora paraensis	45.9002	27.5
varzea	MZVT4	1557	Hevea brasiliensis	52.521	20.8
varzea	MZVT4	1558	Patinoa paraensis	23.1092	13
varzea	MZVT2	156	Mora paraensis	32.945	26.7
varzea	MZVT2	157	Mora paraensis	41.9531	32.3
varzea	MZVT2	158	Swartzia racemosa	15.1515	14.5
varzea	MZVT2	159	Mora paraensis	81.9646	33.2
varzea	MZVT2	16	Quararibea guianensis	6.77998	9.3
varzea	MZVT1	16	Indeterminada indeterminada	5.38	3.5
varzea	MZVT2	160	Quararibea guianensis	8.49885	11.2
varzea	MZVT2	161	Mora paraensis	7.54393	7.5
varzea	MZVT2	164	Licania macrophylla	10.8862	12.5
varzea	MZVT2	168	Mora paraensis	7.9259	11.3
varzea	MZVT2	17	Indeterminada Indeterminada	6.68449	7.3
varzea	MZVT1	17	Mora paraensis	5.25	14.5
varzea	MZVT1	17	Mora paraensis	5.7	7.9
varzea	MZVT2	174	Carapa guianensis	25.0509	23.5
varzea	MZVT2	179	Mora paraensis	11.491	11.3
varzea	MZVT1	18	Carapa guianensis	5.73	7.8
varzea	MZVT1	18	Mora paraensis	6.65	9.4
varzea	MZVT2	182	Pentaclethra macroloba	17.6662	15.6
varzea	MZVT2	183	Inga sp	12.8915	12.3
varzea	MZVT2	184	Mora paraensis	30.7168	24.1
varzea	MZVT2	185	Macrolobium sp	12.7324	9.4
varzea	MZVT2	186	Mora paraensis	7.67125	11.3
varzea	MZVT2	188	Gustavia hexapetala	11.3318	8.5
varzea	MZVT2	189	Mora paraensis	8.27604	7.8
varzea	MZVT2	19	Calycophyllum spruceanum	7.09829	3.9
varzea	MZVT2	19	Mora paraensis	9.99491	9.5
varzea	MZVT2	19	Mora paraensis	5.6659	8.4
varzea	MZVT3	19	Swartzia leptopetala	6.11154	9.3
varzea	MZVT2	190	Mora paraensis	12.2231	11.3
varzea	MZVT2	191	Gustavia hexapetala	8.27604	4.2
varzea	MZVT2	192	Pentaclethra macroloba	13.1143	14.2
varzea	MZVT4	192	Mora paraensis	7.35294	11.9
varzea	MZVT2	193	Mora paraensis	8.37153	10.3
varzea	MZVT2	195	Licania macrophylla	8.30787	5
varzea	MZVT2	197	Pithecellobium inaequale	8.18054	5.5
varzea	MZVT2	199	Pithecellobium inaequale	10.8225	5
varzea	MZVT3	20	Virola surinamensis	6.04787	11.3
varzea	MZVT1	20	Mora paraensis	5.06	7
varzea	MZVT3	20	Mora paraensis	5.02928	4.1
varzea	MZVT3	20	Mora paraensis	5.41126	11.8
varzea	MZVT2	20	Mora paraensis	8.18054	7.1
varzea	MZVT2	20	Pterocarpus officinalis	6.36618	10.7
varzea	MZVT2	20	Swartzia leptopetala	4.93379	2.3
varzea	MZVT2	200	Swartzia racemosa	41.6985	16.5
varzea	MZVT2	201	Mora paraensis	9.86758	12.7
varzea	MZVT2	204	Carapa guianensis	28.9661	19.5
varzea	MZVT2	205	Mora paraensis	15.6926	16.4
varzea	MZVT2	207	Mora paraensis	9.32646	8.9
varzea	MZVT2	208	Swartzia leptopetala	96.4477	25.1
varzea	MZVT2	209	Swartzia racemosa	16.5839	14.7
varzea	MZVT2	21	Platymiscium ulei	10.345	15
varzea	MZVT2	21	Carapa guianensis	6.52534	10.2
varzea	MZVT3	21	Mora paraensis	5.09295	6.4
varzea	MZVT2	210	Swartzia leptopetala	8.59435	9.7
varzea	MZVT2	211	Mora paraensis	6.71632	5.4
varzea	MZVT2	212	Mora paraensis	7.89407	7
varzea	MZVT2	213	Quararibea guianensis	15.5971	12.3
varzea	MZVT2	214	Chrysophyllum excelsum	25.3056	17.3
varzea	MZVT2	216	Mora paraensis	18.4938	18.3
varzea	MZVT2	217	Mora paraensis	10.0904	12.4
varzea	MZVT2	218	Mora paraensis	5.98421	9.5
varzea	MZVT2	219	Mora paraensis	8.91266	9.5
varzea	MZVT2	22	Platymiscium ulei	5.98421	8.6
varzea	MZVT3	22	Mora paraensis	6.36618	13.5
varzea	MZVT2	221	Mora paraensis	9.86758	12.4
varzea	MZVT2	223	Mora paraensis	12.7005	13.2
varzea	MZVT2	226	Mora paraensis	26.3878	19.5
varzea	MZVT2	227	Mora paraensis	8.11688	10.5
varzea	MZVT2	229	Mora paraensis	7.38477	9.8
varzea	MZVT4	23	Pentaclethra macroloba	5.02928	6.3
varzea	MZVT2	23	Swartzia racemosa	5.47492	7.7
varzea	MZVT1	23	Mora paraensis	8.12	13.4
varzea	MZVT3	23	Swartzia leptopetala	4.93379	3.9
varzea	MZVT2	230	Mora paraensis	6.14337	7.7
varzea	MZVT2	231	Mora paraensis	14.9605	17.8
varzea	MZVT2	234	Calycophyllum spruceanum	39.1202	29.7
varzea	MZVT2	237	Mora paraensis	7.98956	10.4
varzea	MZVT2	24	Mora paraensis	5.34759	10.3
varzea	MZVT4	24	Mora paraensis	5.06112	10.2
varzea	MZVT2	241	Mora paraensis	7.09829	7.5
varzea	MZVT2	242	Mora paraensis	6.52534	8.3
varzea	MZVT2	243	Macrolobium sp	51.5661	29.4
varzea	MZVT2	244	Mora paraensis	7.48026	8.9
varzea	MZVT2	245	Mora paraensis	6.20703	8.7
varzea	MZVT2	25	Swartzia racemosa	7.4166	7
varzea	MZVT2	25	Platymiscium ulei	6.68449	10.3
varzea	MZVT4	25	Licania macrophylla	5.28393	8.9
varzea	MZVT2	25	Mora paraensis	22.5681	8.1
varzea	MZVT1	25	Indeterminada indeterminada	5.54	9.3
varzea	MZVT2	251	Mora paraensis	10.5679	15.4
varzea	MZVT2	252	Swartzia racemosa	7.79857	7.3
varzea	MZVT2	254	Licania sp	8.49885	8.3
varzea	MZVT2	258	Mora paraensis	7.25745	9.4
varzea	MZVT2	259	Mora paraensis	7.79857	14.3
varzea	MZVT3	26	Swartzia racemosa	5.02928	10.3
varzea	MZVT2	260	Trichilia sp	37.2422	23.3
varzea	MZVT2	261	Pentaclethra macroloba	24.3506	18.7
varzea	MZVT2	274	Mora paraensis	64.6168	32.4
varzea	MZVT2	279	Trichilia sp	7.54393	11.9
varzea	MZVT2	281	Mora paraensis	11.4591	10.4
varzea	MZVT2	282	Mora paraensis	61.1154	27.4
varzea	MZVT2	284	Trichilia sp	28.6797	16.4
varzea	MZVT2	286	Swartzia racemosa	9.45378	9.7
varzea	MZVT2	29	Heisteria sp	11.3	6.4
varzea	MZVT2	291	Swartzia racemosa	20.6901	13.3
varzea	MZVT2	294	Mora paraensis	17.8571	13.5
varzea	MZVT2	296	Mora paraensis	7.67125	9.7
varzea	MZVT2	297	Mora paraensis	10.918	13.8
varzea	MZVT2	302	Swartzia racemosa	32.945	22
varzea	MZVT2	303	Heisteria sp	8.37153	9
varzea	MZVT2	304	Heisteria sp	13.8464	12.2
varzea	MZVT2	305	Heisteria sp	8.72167	8.7
varzea	MZVT2	306	Pentaclethra macroloba	15.3425	11.5
varzea	MZVT2	308	Pterocarpus officinalis	24.2552	14.2
varzea	MZVT4	31	Indeterminada Indeterminada	6.14337	6.3
varzea	MZVT2	311	Heisteria sp	14.3876	10.6
varzea	MZVT2	314	Mora paraensis	11.6501	9.7
varzea	MZVT2	315	Mora paraensis	14.1966	12.6
varzea	MZVT2	317	Mora paraensis	6.68449	5.5
varzea	MZVT2	322	Pentaclethra macroloba	20.1808	13.5
varzea	MZVT2	325	Mora paraensis	16.2019	12.3
varzea	MZVT2	327	Mora paraensis	9.89941	8.3
varzea	MZVT2	328	Eugenia browsnbergii	13.751	13
varzea	MZVT2	329	Mora paraensis	19.7352	15.2
varzea	MZVT2	332	Swartzia racemosa	58.5689	7.5
varzea	MZVT2	333	Mora paraensis	12.4777	14.9
varzea	MZVT2	334	Mora paraensis	21.3267	14.5
varzea	MZVT2	335	Quararibea guianensis	16.3929	11.6
varzea	MZVT2	339	Mora paraensis	5.85689	4.8
varzea	MZVT2	340	Mora paraensis	13.8146	12.5
varzea	MZVT2	341	Mora paraensis	8.91266	8.5
varzea	MZVT2	342	Mora paraensis	15.4698	15.4
varzea	MZVT2	344	Hevea brasiliensis	49.1469	24
varzea	MZVT2	347	Mora paraensis	62.2613	25.4
varzea	MZVT2	348	Mora paraensis	6.87548	6.4
varzea	MZVT2	349	Mora paraensis	30.2394	19
varzea	MZVT2	350	Mora paraensis	21.5495	18.8
varzea	MZVT2	352	Mora paraensis	26.1013	15.7
varzea	MZVT2	353	Calycophyllum spruceanum	36.6056	17.5
varzea	MZVT2	362	Herrania mariae	6.97097	6.5
varzea	MZVT2	364	Pentaclethra macroloba	24.7963	9.5
varzea	MZVT2	366	Mora paraensis	20.2445	15.9
varzea	MZVT2	368	Pentaclethra macroloba	19.5442	13.5
varzea	MZVT2	369	Pentaclethra macroloba	12.4141	13.2
varzea	MZVT2	37	Pithecellobium inaequale	18.2073	16
varzea	MZVT2	370	Spondias mombim	55.0357	22
varzea	MZVT2	371	Spondias mombim	14.4194	14.5
varzea	MZVT2	372	Pterocarpus officinalis	14.2602	14.7
varzea	MZVT2	374	Tarralea oppositifolia	18.1436	14.7
varzea	MZVT2	379	Platymiscium ulei	11.8411	11.6
varzea	MZVT2	38	Mora paraensis	67.1632	27
varzea	MZVT2	380	Lauraceae sp	10.8225	7.3
varzea	MZVT2	382	Mora paraensis	12.0957	10
varzea	MZVT2	383	Patinoa paraensis	27.5019	12.9
varzea	MZVT2	386	Mora paraensis	6.11154	6.3
varzea	MZVT2	387	Mora paraensis	9.74026	10.6
varzea	MZVT2	388	Mora paraensis	12.7324	13.2
varzea	MZVT2	389	Pentaclethra macroloba	11.2045	7.5
varzea	MZVT2	393	Hernandia guianensis	8.3397	12.5
varzea	MZVT2	394	Mora paraensis	6.04787	3.8
varzea	MZVT2	395	Eugenia browsnbergii	14.0056	10
varzea	MZVT2	396	Mora paraensis	6.93914	7
varzea	MZVT2	398	Mora paraensis	61.9111	26
varzea	MZVT2	40	Macrolobium sp	11.9366	14.7
varzea	MZVT2	400	Mora paraensis	15.7563	12.4
varzea	MZVT2	401	Mora paraensis	13.6873	14.5
varzea	MZVT2	403	Mora paraensis	15.9155	15.9
varzea	MZVT2	404	Parinari excelsa	12.7324	33
varzea	MZVT2	405	Pentaclethra macroloba	26.4197	8.1
varzea	MZVT2	406	Mora paraensis	7.32111	9.9
varzea	MZVT2	407	Mora paraensis	15.5971	10.5
varzea	MZVT2	409	Indeterminada Indeterminada	7.79857	8.3
varzea	MZVT2	410	Mora paraensis	35.3323	21
varzea	MZVT2	412	Virola surinamensis	9.77209	10.6
varzea	MZVT2	413	Platymiscium ulei	12.4141	11.9
varzea	MZVT2	414	Mora paraensis	6.36618	4
varzea	MZVT2	415	Mora paraensis	13.2417	12.5
varzea	MZVT2	417	Mora paraensis	12.7324	22
varzea	MZVT2	418	Xylopia nitida	6.36618	5
varzea	MZVT2	419	Mora paraensis	6.33435	8.7
varzea	MZVT2	420	Pithecellobium inaequale	9.80392	5.2
varzea	MZVT2	421	Mora paraensis	8.08505	9
varzea	MZVT2	426	Maquira coriacea	70.1872	21
varzea	MZVT1	430	Spondias mombim	17.06	14.6
varzea	MZVT1	431	Genipa americana	8.91	7.8
varzea	MZVT1	432	Spondias mombim	24.03	18.4
varzea	MZVT1	433	Spondias mombim	46.79	22.3
varzea	MZVT1	434	Pentaclethra macroloba	31.23	13.4
varzea	MZVT1	435	Hevea brasiliensis	9.52	9.3
varzea	MZVT1	436	Calycophyllum spruceanum	57.84	21.3
varzea	MZVT1	438	Genipa americana	12.8	14.3
varzea	MZVT2	44	Mora paraensis	21.3904	14.7
varzea	MZVT1	442	Genipa americana	19.29	17.2
varzea	MZVT1	443	Sloanea grandifolia	21.74	16.4
varzea	MZVT1	444	Pterocarpus officinalis	14.93	10.1
varzea	MZVT1	446	Carapa guianensis	11.81	5.1
varzea	MZVT1	448	Spondias mombim	15.92	12.3
varzea	MZVT1	449	Heisteria sp	10.09	12.4
varzea	MZVT1	450	Spondias mombim	22.28	18.7
varzea	MZVT1	454	Pentaclethra macroloba	21.45	17.4
varzea	MZVT1	456	Inga sp	7.1	10.6
varzea	MZVT1	457	Mora paraensis	32.15	22.1
varzea	MZVT1	460	Mora paraensis	59.52	26.5
varzea	MZVT1	462	Sterculia sp	7	10.21
varzea	MZVT1	468	Inga sp	15.57	18.5
varzea	MZVT2	47	Mora paraensis	10.5042	10.8
varzea	MZVT1	470	Mora paraensis	43.86	26.4
varzea	MZVT1	471	Pentaclethra macroloba	36.92	27.7
varzea	MZVT1	472	Mora paraensis	80.28	34.5
varzea	MZVT1	474	Mora paraensis	7.61	10.7
varzea	MZVT1	475	Mouriri sp1	11.11	13.4
varzea	MZVT1	476	Swartzia racemosa	6.68	9.9
varzea	MZVT1	477	Mora paraensis	8.72	12.8
varzea	MZVT1	479	Licania sp	84.03	33.2
varzea	MZVT2	48	Macrolobium sp1	53.4441	28.5
varzea	MZVT1	482	Pentaclethra macroloba	27.12	21.1
varzea	MZVT1	483	Mora paraensis	45.61	25.2
varzea	MZVT1	485	Hevea brasiliensis	9.26	13.4
varzea	MZVT1	489	Mora paraensis	6.84	7.2
varzea	MZVT2	49	Mora paraensis	10.9817	10.9
varzea	MZVT1	490	Inga sp	6.02	6.5
varzea	MZVT1	495	Licania sp	16.55	16.5
varzea	MZVT2	5	Calycophyllum spruceanum	25.3056	20.8
varzea	MZVT2	50	Pithecellobium inaequale	70.6646	8.4
varzea	MZVT1	501	Lauraceae sp	11.08	19.4
varzea	MZVT1	502	Mora paraensis	67.48	36.7
varzea	MZVT1	504	Mora paraensis	8.53	13.4
varzea	MZVT1	505	Quararibea guianensis	22.95	21.1
varzea	MZVT1	506	Calycophyllum spruceanum	35.01	31.2
varzea	MZVT1	507	Campsiandra laurifolia	8.59	16.2
varzea	MZVT1	508	Mora paraensis	5.73	6.9
varzea	MZVT1	510	Protium sp	5.89	3
varzea	MZVT1	511	Swartzia racemosa	6.33	9.4
varzea	MZVT1	512	Pentaclethra macroloba	17.98	22.2
varzea	MZVT1	515	Mora paraensis	7	12.3
varzea	MZVT1	516	Mora paraensis	11.94	16.2
varzea	MZVT1	517	Calycophyllum spruceanum	64.01	33.6
varzea	MZVT1	519	Calycophyllum spruceanum	22.63	23.4
varzea	MZVT2	52	Gustavia hexapetala	5.44309	3.1
varzea	MZVT1	522	Mora paraensis	22.41	21.7
varzea	MZVT1	523	Quararibea guianensis	22.63	18.8
varzea	MZVT1	524	Mora paraensis	7.48	11.2
varzea	MZVT1	525	Mora paraensis	7.86	9.4
varzea	MZVT1	526	Campsiandra laurifolia	10.09	16.2
varzea	MZVT1	527	Mora paraensis	15.37	16.8
varzea	MZVT1	529	Mora paraensis	32.15	21.5
varzea	MZVT1	530	Swartzia racemosa	31.51	21
varzea	MZVT1	532	Trichilia sp	7.8	12.6
varzea	MZVT1	533	Pentaclethra macroloba	25.18	19.8
varzea	MZVT1	535	Mora paraensis	16.65	19.2
varzea	MZVT1	540	Chrysophyllum excelsum	14.36	20.7
varzea	MZVT1	544	Mora paraensis	27.37	13.4
varzea	MZVT1	546	Pentaclethra macroloba	9.87	15.3
varzea	MZVT2	55	Heisteria sp	17.2842	13.4
varzea	MZVT1	551	Rheedia macrophylla	5.47	8.6
varzea	MZVT1	552	Macrolobium sp	26.07	21.5
varzea	MZVT1	556	Carapa guianensis	39.22	23.2
varzea	MZVT1	561	Pithecellobium inaequale	5.98	7.4
varzea	MZVT1	565	Carapa guianensis	9.84	14.6
varzea	MZVT1	567	Inga sp	21.01	21.9
varzea	MZVT1	569	Swartzia racemosa	36.29	27.3
varzea	MZVT1	570	Mora paraensis	6.62	7.8
varzea	MZVT1	572	Pentaclethra macroloba	17.83	19.3
varzea	MZVT1	573	Mora paraensis	60.83	33.3
varzea	MZVT1	575	Pouteria filipes	6.37	12.7
varzea	MZVT1	576	Pentaclethra macroloba	28.01	21.8
varzea	MZVT1	577	Mora paraensis	6.72	12.8
varzea	MZVT1	579	Sterculia sp	19.67	23.1
varzea	MZVT2	58	Eugenia browsnbergii	21.5814	17.5
varzea	MZVT1	580	Licania sp	12.03	16.4
varzea	MZVT1	581	Mora paraensis	6.68	9.5
varzea	MZVT1	583	Mora paraensis	43.42	25.4
varzea	MZVT1	585	Mora paraensis	32.79	25.8
varzea	MZVT1	588	Pouteria filipes	79.96	31.7
varzea	MZVT2	59	Heisteria sp	14.6741	15.1
varzea	MZVT1	590	Mora paraensis	82.76	25
varzea	MZVT1	591	Macrolobium sp	23.24	17
varzea	MZVT1	592	Trichilia sp	15.15	15
varzea	MZVT1	594	Calycophyllum spruceanum	7.64	8.1
varzea	MZVT1	595	Pentaclethra macroloba	31.39	11.8
varzea	MZVT1	596	Ormosia coutinhoi	43.51	11.1
varzea	MZVT1	598	Mora paraensis	80.25	29.5
varzea	MZVT2	6	Indeterminada Indeterminada	10.345	11.2
varzea	MZVT2	60	Quararibea guianensis	7.07283	7.4
varzea	MZVT1	600	Mora paraensis	6.37	7.7
varzea	MZVT1	601	Maquira coriacea	17.57	12.2
varzea	MZVT1	602	Mora paraensis	57.52	20.8
varzea	MZVT1	605	Platymiscium ulei	47.11	27
varzea	MZVT1	607	Swartzia racemosa	7.51	9.5
varzea	MZVT1	608	Mora paraensis	10.47	12.6
varzea	MZVT2	61	Swartzia racemosa	12.4777	13.1
varzea	MZVT1	611	Licaria mahuba	41.38	18.8
varzea	MZVT1	613	Mora paraensis	19.45	19
varzea	MZVT1	615	Mora paraensis	5.63	6.8
varzea	MZVT1	617	Pithecellobium inaequale	11.97	12.1
varzea	MZVT1	619	Licania sp	6.59	10
varzea	MZVT1	622	Pithecellobium inaequale	10.22	4.3
varzea	MZVT1	624	Licania sp	6.75	8.9
varzea	MZVT1	625	Mora paraensis	8.24	8.7
varzea	MZVT1	626	Mora paraensis	8.91	11.6
varzea	MZVT1	627	Mora paraensis	39.47	26
varzea	MZVT1	628	Mora paraensis	13.72	17
varzea	MZVT1	629	Mora paraensis	21.96	21
varzea	MZVT1	633	Mora paraensis	10.38	11.7
varzea	MZVT1	634	Mora paraensis	60.48	26
varzea	MZVT1	635	Chrysophyllum excelsum	8.44	9.6
varzea	MZVT1	636	Indeterminada Indeterminada	14.99	19.5
varzea	MZVT2	64	Tarralea oppositifolia	8.97632	8.4
varzea	MZVT1	640	Mora paraensis	33.65	24
varzea	MZVT1	641	Mora paraensis	25.85	21
varzea	MZVT1	642	Mora paraensis	81.04	29
varzea	MZVT1	643	Pithecellobium inaequale	12.48	11.5
varzea	MZVT1	646	Hevea brasiliensis	64.3	26
varzea	MZVT1	648	Mora paraensis	42.75	21
varzea	MZVT1	649	Indeterminada Indeterminada	19.93	19
varzea	MZVT2	65	Carapa guianensis	18.9712	17.1
varzea	MZVT1	650	Carapa guianensis	9.49	13
varzea	MZVT1	652	Ormosia coutinhoi	27.41	22
varzea	MZVT1	653	Pentaclethra macroloba	36.19	13
varzea	MZVT1	655	Pentaclethra macroloba	27.92	22
varzea	MZVT1	657	Carapa guianensis	7.16	12.5
varzea	MZVT1	658	Mora paraensis	11.14	12
varzea	MZVT1	659	Mora paraensis	6.84	9
varzea	MZVT2	66	Platymiscium ulei	48.0328	35.1
varzea	MZVT1	660	Mora paraensis	12.7	13.2
varzea	MZVT1	661	Mora paraensis	6.46	8.5
varzea	MZVT1	662	Mora paraensis	34.73	21
varzea	MZVT1	663	Pterocarpus officinalis	13.97	13.9
varzea	MZVT1	664	Macrolobium sp	9.01	10.3
varzea	MZVT1	665	Mora paraensis	21.42	17.3
varzea	MZVT1	671	Mora paraensis	51.12	27
varzea	MZVT1	672	Swartzia racemosa	14.9	7.3
varzea	MZVT1	673	Indeterminada Indeterminada	12.22	13.3
varzea	MZVT1	674	Mora paraensis	42.34	24
varzea	MZVT1	675	Pentaclethra macroloba	27.79	22
varzea	MZVT1	677	Licaria mahuba	33.42	12
varzea	MZVT1	684	Mora paraensis	23.01	19
varzea	MZVT1	685	Mora paraensis	7.23	8.1
varzea	MZVT1	686	Pouteria filipes	25.94	17.5
varzea	MZVT1	687	Swartzia racemosa	8.47	12
varzea	MZVT1	688	Pouteria filipes	15.15	14
varzea	MZVT1	689	Patinoa paraensis	34.92	14.2
varzea	MZVT2	69	Mora paraensis	43.6084	34.8
varzea	MZVT1	690	Licania macrophylla	31.07	16
varzea	MZVT1	691	Mora paraensis	70.19	12.9
varzea	MZVT1	692	Mora paraensis	11.68	9.6
varzea	MZVT1	694	Mora paraensis	63.69	28
varzea	MZVT1	695	Ormosia coutinhoi	54.11	23
varzea	MZVT1	696	Chrysophyllum excelsum	24.06	14.5
varzea	MZVT2	7	Indeterminada Indeterminada	11.6183	12.3
varzea	MZVT1	702	Swartzia leptopetala	58.12	23
varzea	MZVT1	705	Swartzia racemosa	43.93	24
varzea	MZVT1	708	Hevea brasiliensis	74.17	26
varzea	MZVT1	709	Pentaclethra macroloba	48.06	22
varzea	MZVT2	71	Pentaclethra macroloba	35.1413	30
varzea	MZVT1	711	Indeterminada Indeterminada	21.17	12
varzea	MZVT1	715	Mora paraensis	72.99	26
varzea	MZVT1	718	Mora paraensis	79.74	29
varzea	MZVT1	719	Hevea brasiliensis	8.79	12.7
varzea	MZVT2	72	Licania sp	65.2534	35.5
varzea	MZVT1	720	Mora paraensis	36.38	25
varzea	MZVT1	721	Mora paraensis	31.61	20
varzea	MZVT1	722	Virola surinamensis	33.58	19
varzea	MZVT1	725	Hevea brasiliensis	20.37	13.8
varzea	MZVT1	727	Piptadenia viridiflora	26.42	23.5
varzea	MZVT1	728	Ficus maxima	95.56	29
varzea	MZVT1	735	Mora paraensis	6.62	7.3
varzea	MZVT1	736	Mora paraensis	5.76	8
varzea	MZVT1	739	Mora paraensis	7.86	10.4
varzea	MZVT1	740	Mora paraensis	10.28	10.6
varzea	MZVT1	741	Pouteria filipes	67.48	26
varzea	MZVT1	743	Pseudobombax munguba	45.61	23.5
varzea	MZVT1	744	Pterocarpus officinalis	19.42	13.8
varzea	MZVT1	745	Mora paraensis	40.74	34
varzea	MZVT1	747	Mora paraensis	63.69	19
varzea	MZVT1	748	Mouriri sp1	19.35	15
varzea	MZVT1	755	Mora paraensis	38.74	22
varzea	MZVT1	757	Mora paraensis	13.24	14.5
varzea	MZVT1	758	Rheedia macrophylla	23.78	26.5
varzea	MZVT1	759	Mora paraensis	10.31	12
varzea	MZVT3	760	Calycophyllum spruceanum	15.5971	12.3
varzea	MZVT2	77	Pithecellobium inaequale	10.0267	4.5
varzea	MZVT3	777	Calycophyllum spruceanum	24.0323	21.9
varzea	MZVT3	782	Calycophyllum spruceanum	17.6662	22.2
varzea	MZVT3	797	Pentaclethra macroloba	18.7802	17.5
varzea	MZVT3	799	Licania sp	37.9743	25.4
varzea	MZVT2	8	Calycophyllum spruceanum	29.3799	28.7
varzea	MZVT2	80	Calycophyllum spruceanum	49.4334	35.8
varzea	MZVT3	802	Mora paraensis	20.2126	20.4
varzea	MZVT3	803	Patinoa paraensis	10.5042	10.3
varzea	MZVT3	806	Mora paraensis	48.2238	36.3
varzea	MZVT2	81	Maquira coriacea	10.1541	10.9
varzea	MZVT3	811	Mora paraensis	10.918	17.2
varzea	MZVT3	812	Mora paraensis	16.6476	18.6
varzea	MZVT3	813	Licania sp	22.1225	21.4
varzea	MZVT3	816	Mora paraensis	5.31576	12.7
varzea	MZVT3	817	Genipa americana	46.7914	25.7
varzea	MZVT3	818	Mora paraensis	9.51744	16.4
varzea	MZVT3	822	Calycophyllum spruceanum	6.87548	11.7
varzea	MZVT3	823	Calycophyllum spruceanum	14.8969	19.8
varzea	MZVT3	828	Licania sp	39.3112	23.4
varzea	MZVT3	829	Maquira coriacea	20.4036	19.4
varzea	MZVT3	830	Pentaclethra macroloba	23.3957	22.1
varzea	MZVT3	831	Mora paraensis	9.39012	11.7
varzea	MZVT3	832	Patinoa paraensis	24.3506	14.3
varzea	MZVT3	834	Mora paraensis	74.166	33.7
varzea	MZVT3	835	Mora paraensis	6.36618	13.8
varzea	MZVT3	836	Pentaclethra macroloba	23.2366	16.8
varzea	MZVT3	838	Licania sp	20.6901	22.7
varzea	MZVT3	839	Licania sp	20.3718	22.9
varzea	MZVT3	842	Sterculia sp	12.2549	15.5
varzea	MZVT3	844	Chrysophyllum excelsum	19.576	22.7
varzea	MZVT3	846	Lauraceae sp	6.68449	13.5
varzea	MZVT3	848	Mora paraensis	45.5819	26.4
varzea	MZVT3	850	Pterocarpus officinalis	20.3718	18.6
varzea	MZVT3	851	Pterocarpus officinalis	15.6926	14.7
varzea	MZVT3	852	Heisteria sp	9.70843	15.2
varzea	MZVT3	854	Patinoa paraensis	11.1408	11.3
varzea	MZVT3	857	Mora paraensis	17.6662	21.1
varzea	MZVT3	858	Mora paraensis	5.72956	6.3
varzea	MZVT3	859	Eugenia browsnbergii	7.38477	10.5
varzea	MZVT3	860	Inga sp	7.60759	9.7
varzea	MZVT3	861	Mora paraensis	9.58111	11.3
varzea	MZVT3	863	Mora paraensis	8.91266	14.7
varzea	MZVT3	864	Mora paraensis	14.1648	15.5
varzea	MZVT3	865	Mora paraensis	12.2549	16.7
varzea	MZVT3	866	Mora paraensis	7.0028	9.3
varzea	MZVT3	869	Mora paraensis	73.6886	34.3
varzea	MZVT3	870	Licania macrophylla	6.04787	5.2
varzea	MZVT3	871	Patinoa paraensis	8.65801	6.9
varzea	MZVT3	872	Pithecellobium inaequale	9.80392	4.3
varzea	MZVT3	874	Caryocar microcarpum	27.1199	19.3
varzea	MZVT3	875	Pterocarpus officinalis	26.4197	24.1
varzea	MZVT3	879	Pentaclethra macroloba	20.0216	21.2
varzea	MZVT3	882	Licania macrophylla	11.0772	6
varzea	MZVT3	883	Carapa guianensis	12.7324	18.4
varzea	MZVT3	884	Pterocarpus officinalis	42.3669	12.3
varzea	MZVT3	885	Mora paraensis	63.3435	26.8
varzea	MZVT3	888	Mora paraensis	14.9605	16.2
varzea	MZVT3	889	Mora paraensis	7.32111	10.3
varzea	MZVT3	890	Mora paraensis	18.9394	19.3
varzea	MZVT3	891	Pouteria reticulata	37.8788	25.7
varzea	MZVT3	892	Mora paraensis	6.20703	7.5
varzea	MZVT3	893	Indeterminada Indeterminada	28.9661	23.4
varzea	MZVT3	894	Patinoa paraensis	13.0507	12.3
varzea	MZVT3	895	Zygia sp	10.5042	11.4
varzea	MZVT3	896	Pouteria reticulata	35.9053	22.3
varzea	MZVT3	897	Mora paraensis	26.5788	21.7
varzea	MZVT2	9	Platymiscium ulei	13.6873	16.9
varzea	MZVT2	90	Mora paraensis	9.96308	5
varzea	MZVT3	900	Licania sp	8.59435	13.4
varzea	MZVT3	901	Heisteria sp	12.0321	11.7
varzea	MZVT3	902	Hevea brasiliensis	38.9292	21
varzea	MZVT3	903	Licania sp	8.7535	13.89
varzea	MZVT3	904	Mora paraensis	42.0805	25
varzea	MZVT3	907	Mora paraensis	5.7614	6.2
varzea	MZVT3	908	Mora paraensis	11.0772	14.3
varzea	MZVT3	909	Mora paraensis	12.4141	12.8
varzea	MZVT2	91	Mora paraensis	9.93125	5
varzea	MZVT3	910	Mora paraensis	24.4461	23.3
varzea	MZVT3	914	Mora paraensis	16.5521	21.4
varzea	MZVT3	917	Calycophyllum spruceanum	34.2819	26
varzea	MZVT3	918	Symphonia globulifera	7.0028	8.4
varzea	MZVT3	919	Patinoa paraensis	21.9633	16.4
varzea	MZVT2	92	Mora paraensis	19.5442	22.3
varzea	MZVT3	920	Pentaclethra macroloba	22.9819	20.3
varzea	MZVT3	926	Hevea brasiliensis	29.2844	23.2
varzea	MZVT3	927	Mora paraensis	20.4354	17.2
varzea	MZVT3	928	Pentaclethra macroloba	10.4405	15.7
varzea	MZVT2	93	Mora paraensis	6.74815	10.5
varzea	MZVT3	933	Mora paraensis	14.1011	12.7
varzea	MZVT3	934	Mora paraensis	21.0084	15.3
varzea	MZVT3	937	Indeterminada Indeterminada	6.46168	8.3
varzea	MZVT3	940	Mora paraensis	9.19913	13.5
varzea	MZVT3	941	Swartzia racemosa	14.7377	16.3
varzea	MZVT3	949	Indeterminada Indeterminada	5.88872	4.7
varzea	MZVT2	95	Mora paraensis	5.92055	7
varzea	MZVT3	950	Licania sp	9.13547	11.3
varzea	MZVT3	951	Calyptranthes speciosa	19.1304	17.3
varzea	MZVT3	952	Mora paraensis	8.43519	14.9
varzea	MZVT3	955	Eugenia browsnbergii	17.6662	18.3
varzea	MZVT3	956	Pentaclethra macroloba	17.8253	21.3
varzea	MZVT3	958	Virola surinamensis	6.11154	9.2
varzea	MZVT3	959	Pouteria reticulata	24.4461	18.7
varzea	MZVT3	965	Mora paraensis	27.3746	23.1
varzea	MZVT3	967	Mora paraensis	14.0693	18.8
varzea	MZVT3	971	Licania sp	45.6137	28.3
varzea	MZVT3	972	Mora paraensis	17.507	19.9
varzea	MZVT3	974	Trichilia sp	12.1594	18.3
varzea	MZVT3	977	Pentaclethra macroloba	15.2152	21.1
varzea	MZVT3	980	Swartzia racemosa	49.4016	23.1
varzea	MZVT3	981	Pentaclethra macroloba	13.8464	13.1
varzea	MZVT3	982	Pentaclethra macroloba	5.2521	8.5
varzea	MZVT3	985	Pentaclethra macroloba	11.6501	12.2
varzea	MZVT3	986	Patinoa paraensis	12.7324	16.8
varzea	MZVT3	987	Pentaclethra macroloba	19.0985	17.7
varzea	MZVT3	988	Pentaclethra macroloba	18.3028	20.3
varzea	MZVT3	990	Mouriri sp1	12.987	13.8
varzea	MZVT3	992	Chrysophyllum excelsum	14.3239	13.8
varzea	MZVT3	993	Licaria mahuba	37.9424	22.5
varzea	MZVT3	994	Pentaclethra macroloba	10.536	13.8
varzea	MZVT3	995	Licania sp	114.05	30
varzea	MZVT3	998	Indeterminada Indeterminada	5.82506	2.5
varzea	MZVT3	N7	Carapa guianensis	9.89941	10.2
